# Supplementary material for: Investigating the growth performance, meat quality, immune function and proteomic profiles of plasmal exosomes in Lactobacillus plantarum-treated broilers with immunological stress
Source: Royal Society of Chemistry journal article supplement (doi:10.1039/d1fo01936h), 2021-01-01
Supplement: d1fo01936h1.pdf [file d1fo01936h1.pdf]

**Table S1** Composition and nutrient levels of basal diets (air-dry basis) %

| Item                          | Content      |
|-------------------------------|--------------|
|                               | 1 to 3 weeks |
| Ingredients                   |              |
| Corn                          | 61.38        |
| Soybean meal                  | 31.00        |
| Fish meal                     | 2.00         |
| Soybean oil                   | 2.00         |
| Limestone                     | 1.50         |
| CaHPO <sub>4</sub>            | 1.30         |
| <i>DL</i> -Met                | 0.22         |
| NaCl                          | 0.30         |
| Premix <sup>1)</sup>          | 0.20         |
| Choline chloride              | 0.10         |
| Total                         | 100.00       |
| Nutrient levels <sup>2)</sup> |              |
| ME/(MJ/kg)                    | 12.47        |
| CP                            | 20.55        |
| CF                            | 4.59         |
| Ca                            | 0.95         |
| AP                            | 0.46         |
| Lys                           | 1.10         |
| Met                           | 0.55         |

<sup>1)</sup>The premix provided the following per kg of diets: VA 8000 IU, VB<sub>1</sub> 4.2 mg, VB<sub>2</sub> 4 mg, VB<sub>6</sub> 4.5 mg, VB<sub>12</sub> 0.02 mg, VD<sub>3</sub> 3000 IU, VE 20 IU, VK<sub>3</sub> 2 mg, biotin 0.15 mg, folic acid 1.0 mg, *D*-pantothenic acid 11 mg, nicotinic acid 10 mg, Cu (as copper sulfate) 10 mg, Fe (as ferrous sulfate) 80 mg, Mn (as manganese sulfate) 80 mg, Zn (as zinc sulfate) 75 mg, I (as potassium iodide) 0.40 mg, Se (as sodium selenite) 0.30 mg.

<sup>2)</sup>The nutrient levels were calculated values.

**Table S2** Protein data statistics table

| Items                | Number |
|----------------------|--------|
| Total protein number | 784    |
| Total peptide number | 5099   |
| Unique peptides      | 4087   |

**Table S3** Comparison of the proteomics analysis between DEX and CON groups by KEGG

| ID      | Description              | GeneRati |         |           | p.adjust  | qvalue    | geneID                          | Count |
|---------|--------------------------|----------|---------|-----------|-----------|-----------|---------------------------------|-------|
|         |                          | o        | BgRatio | pvalue    |           |           |                                 |       |
| gga0451 |                          |          |         |           | 0.0106680 | 0.0083419 |                                 |       |
| 2       | ECM-receptor interaction | 5/32     | 70/3644 | 0.0003048 | 5         | 3         | COL6A3/ITGA6/CD36/ITGAV/CD47    | 5     |
| gga0451 |                          |          | 169/364 | 0.0030155 | 0.0228770 |           | COL6A3/ITGA6/ITGAV/ILK/RAP1A/ZY |       |
| 0       | Focal adhesion           | 6/32     | 4       | 8         | 2         | 0.0178888 | X                               | 6     |
| gga0481 | Regulation of actin      |          | 169/364 | 0.0030155 | 0.0228770 |           | GSN/ITGA6/KRAS/ITGAV/WASF2/BAIA |       |
| 0       | cytoskeleton             | 6/32     | 4       | 8         | 2         | 0.0178888 | P2                              | 6     |
| gga0414 |                          |          | 170/364 | 0.0031064 | 0.0228770 |           | CLTC/RAB7A/HSPA2/CHMP5/BF2/CHM  |       |
| 4       | Endocytosis              | 6/32     | 4       | 7         | 2         | 0.0178888 | P1A                             | 6     |
| gga0414 |                          |          | 118/364 | 0.0032681 | 0.0228770 |           |                                 |       |
| 5       | Phagosome                | 5/32     | 4       | 5         | 2         | 0.0178888 | CD36/ITGAV/RAB7A/TUBB/BF2       | 5     |
| gga0332 |                          |          |         | 0.0112647 | 0.0657111 | 0.0513831 |                                 |       |
| 0       | PPAR signaling pathway   | 3/32     | 54/3644 | 6         | 1         | 2         | FABP6/CD36/ILK                  | 3     |
| gga0452 |                          |          |         | 0.0170984 | 0.0854924 | 0.0668512 |                                 |       |
| 0       | Adherens junction        | 3/32     | 63/3644 | 9         | 7         | 6         | WASF2/BAIAP2/PTPRJ              | 3     |
| gga0305 |                          |          |         | 0.0333063 | 0.1457152 | 0.1139427 |                                 |       |
| 0       | Proteasome               | 2/32     | 33/3644 | 4         | 2         | 3         | PSMA3/PSMA5                     | 2     |
| gga0451 | Cell adhesion molecules  |          |         |           | 0.1869657 | 0.1461987 |                                 |       |
| 4       | (CAMs)                   | 3/32     | 94/3644 | 0.0480769 | 2         | 6         | ITGA6/ITGAV/BF2                 | 3     |
| gga0077 | Pantothenate and CoA     |          |         | 0.1005797 | 0.3296032 |           |                                 |       |
| 0       | biosynthesis             | 1/32     | 12/3644 | 8         | 9         | 0.2577349 | VNN1                            | 1     |
| gga0461 | Renin-angiotensin system | 1/32     | 13/3644 | 0.1085041 | 0.3296032 | 0.2577349 | AGT                             | 1     |

|         |                              |      |         |           |           |           |                  |  |   |
|---------|------------------------------|------|---------|-----------|-----------|-----------|------------------|--|---|
| 4       |                              |      |         | 9         | 9         |           |                  |  |   |
| gga0301 |                              |      |         | 0.1278450 | 0.3296032 |           |                  |  |   |
| 0       | Ribosome                     | 2/32 | 71/3644 | 3         | 9         | 0.2577349 | RPL6/RPL24       |  | 2 |
| gga0401 |                              |      |         | 0.1367650 | 0.3296032 |           |                  |  |   |
| 2       | ErbB signaling pathway       | 2/32 | 74/3644 | 2         | 9         | 0.2577349 | CAMK2D/KRAS      |  | 2 |
| gga0454 |                              |      |         | 0.1397699 | 0.3296032 |           |                  |  |   |
| 0       | Gap junction                 | 2/32 | 75/3644 | 7         | 9         | 0.2577349 | KRAS/TUBB        |  | 2 |
| gga0491 |                              |      |         | 0.1458244 | 0.3296032 |           |                  |  |   |
| 2       | GnRH signaling pathway       | 2/32 | 77/3644 | 2         | 9         | 0.2577349 | CAMK2D/KRAS      |  | 2 |
| gga0432 |                              |      |         | 0.1546492 | 0.3296032 |           |                  |  |   |
| 0       | Dorso-ventral axis formation | 1/32 | 19/3644 | 8         | 9         | 0.2577349 | KRAS             |  | 1 |
| gga0491 |                              |      |         | 0.1643110 | 0.3296032 |           |                  |  |   |
| 6       | Melanogenesis                | 2/32 | 83/3644 | 3         | 9         | 0.2577349 | CAMK2D/KRAS      |  | 2 |
| gga0306 |                              |      |         | 0.1695102 | 0.3296032 |           |                  |  |   |
| 0       | Protein export               | 1/32 | 21/3644 | 6         | 9         | 0.2577349 | HSPA5            |  | 1 |
| gga0401 |                              |      | 203/364 | 0.2626356 | 0.4838024 | 0.3783116 |                  |  |   |
| 0       | MAPK signaling pathway       | 3/32 | 4       | 1         | 5         | 9         | KRAS/HSPA2/RAP1A |  | 3 |
| gga0033 | Arginine and proline         |      |         | 0.2796246 |           | 0.3826442 |                  |  |   |
| 0       | metabolism                   | 1/32 | 37/3644 | 3         | 0.4893431 | 3         | CKM              |  | 1 |
| gga0414 | Protein processing in        |      | 132/364 | 0.3238078 | 0.5396797 | 0.4220052 |                  |  |   |
| 1       | endoplasmic reticulum        | 2/32 | 4       | 5         | 5         | 2         | HSPA5/HSPA2      |  | 2 |
| gga0411 |                              |      |         |           | 0.5883303 | 0.4600477 |                  |  |   |
| 5       | p53 signaling pathway        | 1/32 | 53/3644 | 0.3755357 | 1         | 6         | CD82             |  | 1 |
| gga0492 | Adipocytokine signaling      |      |         | 0.3866170 | 0.5883303 | 0.4600477 |                  |  |   |
| 0       | pathway                      | 1/32 | 55/3644 | 6         | 1         | 6         | CD36             |  | 1 |

|         |                              |      |         |           |           |           |        |   |
|---------|------------------------------|------|---------|-----------|-----------|-----------|--------|---|
| gga0437 |                              |      |         |           | 0.6030113 | 0.4715276 |        |   |
| 0       | VEGF signaling pathway       | 1/32 | 60/3644 | 0.4134935 | 5         | 7         | KRAS   | 1 |
| gga0465 | Natural killer cell mediated |      |         | 0.4442414 | 0.6219379 | 0.4863274 |        |   |
| 0       | cytotoxicity                 | 1/32 | 66/3644 | 2         | 9         | 5         | KRAS   | 1 |
| gga0491 | Progesterone-mediated        |      |         | 0.4686665 | 0.6308972 | 0.4933331 |        |   |
| 4       | oocyte maturation            | 1/32 | 71/3644 | 1         | 3         | 7         | KRAS   | 1 |
| gga0411 |                              |      |         | 0.5482782 | 0.6997186 | 0.5471484 |        |   |
| 4       | Oocyte meiosis               | 1/32 | 89/3644 | 9         | 8         | 4         | CAMK2D | 1 |
| gga0414 |                              |      |         | 0.5603705 | 0.6997186 | 0.5471484 |        |   |
| 2       | Lysosome                     | 1/32 | 92/3644 | 8         | 8         | 4         | CLTC   | 1 |
| gga0304 |                              |      |         |           | 0.6997186 | 0.5471484 |        |   |
| 0       | Spliceosome                  | 1/32 | 98/3644 | 0.5836215 | 8         | 4         | HSPA2  | 1 |
| gga0491 |                              |      | 107/364 | 0.6162792 | 0.6997186 | 0.5471484 |        |   |
| 0       | Insulin signaling pathway    | 1/32 | 4       | 2         | 8         | 4         | KRAS   | 1 |
| gga0453 |                              |      | 108/364 | 0.6197508 | 0.6997186 | 0.5471484 |        |   |
| 0       | Tight junction               | 1/32 | 4       | 3         | 8         | 4         | KRAS   | 1 |
| gga0431 |                              |      | 122/364 | 0.6652722 | 0.7276415 | 0.5689828 |        |   |
| 0       | Wnt signaling pathway        | 1/32 | 4       | 5         | 2         | 4         | CAMK2D | 1 |
| gga0402 |                              |      | 142/364 | 0.7212610 | 0.7649738 | 0.5981750 |        |   |
| 0       | Calcium signaling pathway    | 1/32 | 4       | 8         | 8         | 6         | CAMK2D | 1 |
| gga0408 | Neuroactive ligand-receptor  |      | 235/364 | 0.8826571 | 0.9086176 | 0.7104979 |        |   |
| 0       | interaction                  | 1/32 | 4       | 1         | 1         | 8         | C5AR1  | 1 |

**Table S4** Comparison of the proteomics analysis between P8+DEX and DEX groups by KEGG

| ID       | Description                       | GeneRatio | BgRatio  | pvalue    | p.adjust  | qvalue    | geneID             | Count |
|----------|-----------------------------------|-----------|----------|-----------|-----------|-----------|--------------------|-------|
|          |                                   |           |          |           | 0.3334840 | 0.3233224 |                    |       |
| gga04012 | ErbB signaling pathway            | 3/23      | 74/3644  | 0.0106349 | 4         | 8         | PAK3/KRAS/CAMK2D   | 3     |
|          |                                   |           |          | 0.0178696 | 0.3334840 | 0.3233224 |                    |       |
| gga03050 | Proteasome                        | 2/23      | 33/3644  | 4         | 4         | 8         | PSMA5/PSMA3        | 2     |
|          |                                   |           |          | 0.0447113 | 0.3334840 | 0.3233224 |                    |       |
| gga03320 | PPAR signaling pathway            | 2/23      | 54/3644  | 1         | 4         | 8         | ILK/FABP6          | 2     |
|          |                                   |           |          | 0.0732730 | 0.3334840 | 0.3233224 |                    |       |
| gga00770 | Pantothenate and CoA biosynthesis | 1/23      | 12/3644  | 1         | 4         | 8         | VNN1               | 1     |
|          |                                   |           |          | 0.0791416 | 0.3334840 | 0.3233224 |                    |       |
| gga04614 | Renin-angiotensin system          | 1/23      | 13/3644  | 1         | 4         | 8         | AGT                | 1     |
|          |                                   |           |          | 0.0838129 | 0.3334840 | 0.3233224 |                    |       |
| gga04912 | GnRH signaling pathway            | 2/23      | 77/3644  | 4         | 4         | 8         | KRAS/CAMK2D        | 2     |
|          |                                   |           |          | 0.0879375 | 0.3334840 | 0.3233224 |                    |       |
| gga04510 | Focal adhesion                    | 3/23      | 169/3644 | 9         | 4         | 8         | PAK3/SPP1/ILK      | 3     |
|          |                                   |           |          | 0.0879375 | 0.3334840 | 0.3233224 |                    |       |
| gga04810 | Regulation of actin cytoskeleton  | 3/23      | 169/3644 | 9         | 4         | 8         | PAK3/KRAS/RDX      | 3     |
|          |                                   |           |          | 0.0891544 | 0.3334840 | 0.3233224 | RABEP1/RAB7A/VPS37 |       |
| gga04144 | Endocytosis                       | 3/23      | 170/3644 | 7         | 4         | 8         | C                  | 3     |
|          |                                   |           |          | 0.0953018 | 0.3334840 | 0.3233224 |                    |       |
| gga04916 | Melanogenesis                     | 2/23      | 83/3644  | 2         | 4         | 8         | KRAS/CAMK2D        | 2     |
|          |                                   |           |          | 0.0965348 | 0.3334840 | 0.3233224 |                    |       |
| gga00910 | Nitrogen metabolism               | 1/23      | 16/3644  | 5         | 4         | 8         | CA2                | 1     |
|          |                                   |           |          |           | 0.3388172 | 0.3284931 |                    |       |
| gga04320 | Dorso-ventral axis formation      | 1/23      | 19/3644  | 0.1136136 | 3         | 6         | KRAS               | 1     |

|          |                                    |      |         |           |           |           |             |   |
|----------|------------------------------------|------|---------|-----------|-----------|-----------|-------------|---|
|          |                                    |      |         | 0.1174657 | 0.3388172 | 0.3284931 |             |   |
| gga04514 | Cell adhesion molecules (CAMs)     | 2/23 | 94/3644 | 2         | 3         | 6         | VCAM1/L1CAM | 2 |
|          |                                    |      |         |           | 0.3388172 | 0.3284931 |             |   |
| gga03060 | Protein export                     | 1/23 | 21/3644 | 0.1248274 | 3         | 6         | HSPA5       | 1 |
|          |                                    |      |         | 0.1468492 | 0.3720180 | 0.3606823 |             |   |
| gga00640 | Propanoate metabolism              | 1/23 | 25/3644 | 4         | 8         | 5         | LDHB        | 1 |
|          |                                    |      |         | 0.1788909 | 0.4115579 | 0.3990173 |             |   |
| gga00270 | Cysteine and methionine metabolism | 1/23 | 31/3644 | 2         | 2         | 7         | LDHB        | 1 |
|          |                                    |      |         | 0.1841180 | 0.4115579 | 0.3990173 |             |   |
| gga00620 | Pyruvate metabolism                | 1/23 | 32/3644 | 2         | 2         | 7         | LDHB        | 1 |
|          |                                    |      |         | 0.2097796 | 0.4428681 | 0.4293735 |             |   |
| gga00330 | Arginine and proline metabolism    | 1/23 | 37/3644 | 4         | 3         | 3         | CKM         | 1 |
|          |                                    |      |         | 0.2444121 | 0.4888242 | 0.4739293 |             |   |
| gga00010 | Glycolysis / Gluconeogenesis       | 1/23 | 44/3644 | 3         | 5         | 3         | LDHB        | 1 |
|          |                                    |      |         | 0.3182036 | 0.5419536 | 0.5254398 |             |   |
| gga04370 | VEGF signaling pathway             | 1/23 | 60/3644 | 7         | 6         | 4         | KRAS        | 1 |
|          | Natural killer cell mediated       |      |         | 0.3440560 | 0.5419536 | 0.5254398 |             |   |
| gga04650 | cytotoxicity                       | 1/23 | 66/3644 | 3         | 6         | 4         | KRAS        | 1 |
|          |                                    |      |         | 0.3566279 | 0.5419536 | 0.5254398 |             |   |
| gga04350 | TGF-beta signaling pathway         | 1/23 | 69/3644 | 5         | 6         | 4         | AMH         | 1 |
|          |                                    |      |         | 0.3607671 | 0.5419536 | 0.5254398 |             |   |
| gga04512 | ECM-receptor interaction           | 1/23 | 70/3644 | 2         | 6         | 4         | SPP1        | 1 |
|          |                                    |      |         | 0.3648808 | 0.5419536 | 0.5254398 |             |   |
| gga03010 | Ribosome                           | 1/23 | 71/3644 | 2         | 6         | 4         | RPL6        | 1 |
| gga04914 | Progesterone-mediated oocyte       | 1/23 | 71/3644 | 0.3648808 | 0.5419536 | 0.5254398 | KRAS        | 1 |

|          |                                        |      |          |           |           |           |        |   |
|----------|----------------------------------------|------|----------|-----------|-----------|-----------|--------|---|
|          | maturation                             |      |          | 2         | 6         | 4         |        |   |
|          |                                        |      |          | 0.3810838 | 0.5419536 | 0.5254398 |        |   |
| gga04540 | Gap junction                           | 1/23 | 75/3644  | 1         | 6         | 4         | KRAS   | 1 |
|          |                                        |      |          | 0.3850723 | 0.5419536 | 0.5254398 |        |   |
| gga04620 | Toll-like receptor signaling pathway   | 1/23 | 76/3644  | 4         | 6         | 4         | SPP1   | 1 |
|          |                                        |      |          |           | 0.5900004 | 0.5720226 |        |   |
| gga04114 | Oocyte meiosis                         | 1/23 | 89/3644  | 0.4347372 | 8         | 3         | CAMK2D | 1 |
|          |                                        |      |          | 0.4972085 | 0.6339388 | 0.6146221 |        |   |
| gga04910 | Insulin signaling pathway              | 1/23 | 107/3644 | 2         | 2         | 3         | KRAS   | 1 |
|          |                                        |      |          | 0.5004780 | 0.6339388 | 0.6146221 |        |   |
| gga04530 | Tight junction                         | 1/23 | 108/3644 | 2         | 2         | 3         | KRAS   | 1 |
|          |                                        |      |          | 0.5320738 | 0.6462008 | 0.6265104 |        |   |
| gga04145 | Phagosome                              | 1/23 | 118/3644 | 8         | 2         | 9         | RAB7A  | 1 |
|          |                                        |      |          | 0.5441691 | 0.6462008 | 0.6265104 |        |   |
| gga04310 | Wnt signaling pathway                  | 1/23 | 122/3644 | 1         | 2         | 9         | CAMK2D | 1 |
|          | Protein processing in endoplasmic      |      |          | 0.5731128 | 0.6574298 | 0.6373973 |        |   |
| gga04141 | reticulum                              | 1/23 | 132/3644 | 2         | 5         | 6         | HSPA5  | 1 |
|          |                                        |      |          |           | 0.6574298 | 0.6373973 |        |   |
| gga04020 | Calcium signaling pathway              | 1/23 | 142/3644 | 0.6002937 | 5         | 6         | CAMK2D | 1 |
|          |                                        |      |          | 0.6055274 | 0.6574298 | 0.6373973 |        |   |
| gga04060 | Cytokine-cytokine receptor interaction | 1/23 | 144/3644 | 9         | 5         | 6         | AMH    | 1 |
|          |                                        |      |          | 0.7335237 | 0.7742750 | 0.7506821 |        |   |
| gga04010 | MAPK signaling pathway                 | 1/23 | 203/3644 | 1         | 2         | 5         | KRAS   | 1 |
|          | Neuroactive ligand-receptor            |      |          | 0.7852015 | 0.8064232 | 0.7818507 |        |   |
| gga04080 | interaction                            | 1/23 | 235/3644 | 8         | 5         | 9         | C5AR1  | 1 |



**Table S5** Multiple reaction monitoring (MRM) analysis of plasmal exosomal proteins

| Accession | Gene Symbol | DEX/CON FC | DEX/CON p_value | DEX+P8/C ON FC | DEX+P8/C ON p_value | DEX+P8/D EX FC | DEX+P8/D EX p_value | CON_aver age | DEX_aver age | DEX+P8_aver age |
|-----------|-------------|------------|-----------------|----------------|---------------------|----------------|---------------------|--------------|--------------|-----------------|
| A0A1D5PG  |             | 1.1009068  | 0.7550594       |                |                     | 0.37741019     | 0.06120464          | 664305.666   | 731338.666   |                 |
| T3        | BAIAP2      | 62         | 17              | 0.41549347     | 0.02010349          | 2              | 4                   | 7            | 7            | 276014.6667     |
| A0A1D5PM  |             | 3.1821924  | 0.0467276       | 2.79059796     | 0.10194933          | 0.87694193     | 0.72993714          |              |              |                 |
| A3        | NELL2       | 12         | 74              | 2              | 4                   | 2              | 1                   | 859218       | 2734197      | 2397732         |
| A0A3Q2U50 |             | 1.2077623  | 0.4897297       | 0.66234558     | 0.19084499          | 0.54840722     | 0.07173971          | 2042723.66   | 2467124.66   |                 |
| 4         | PROS1       | 16         | 15              | 4              | 1                   | 8              | 1                   | 7            | 7            | 1352989         |
| A0A3Q2UFJ |             | 1.2356395  |                 |                | 0.01802243          | 0.46955910     | 0.02050655          | 3157682.33   | 3901757.33   |                 |
| 3         | CAMK2D      | 99         | 0.2951612       | 0.58020582     | 8                   | 1              | 6                   | 3            | 3            | 1832105.667     |
| B5BSS3    |             | 0.8753621  | 0.7643922       |                | 0.51747720          | 0.78911613     | 0.47765300          |              |              |                 |
|           | BF2         | 15         | 71              | 0.69076237     | 5                   | 6              | 9                   | 412162       | 360791       | 284706          |
| E1C007    |             | 0.9737639  | 0.9708582       | 0.37654628     | 0.24567549          | 0.38669153     | 0.38345951          | 15448873.6   | 15043556.6   |                 |
|           | PACSIN2     | 77         | 35              | 6              | 4                   | 4              | 5                   | 7            | 7            | 5817216         |
| E1C3Y3    |             | 0.9822350  | 0.9343658       | 1.28260131     | 0.58047973          | 1.30579881     | 0.55223361          | 9718178.33   |              |                 |
|           | TSPAN8      | 11         | 48              | 7              | 8                   | 9              | 3                   | 3            | 9545535      | 12464548.33     |
| F1NEB3    |             | 1.0211664  | 0.9057686       | 0.97021449     | 0.90571794          |                |                     | 13736156.6   | 14026901.6   |                 |
|           | HABP2       | 01         | 84              | 7              | 1                   | 0.95010421     | 0.815898            | 7            | 7            | 13327018.33     |

|        |           |           |           |            |            |            |            |            |            |             |
|--------|-----------|-----------|-----------|------------|------------|------------|------------|------------|------------|-------------|
| F1NIW7 | CUBN      | 0.5549430 | 0.2239295 |            | 0.04297254 | 0.20725570 | 0.00348189 | 10884433.6 | 6040240.66 |             |
|        |           | 36        | 54        | 0.11501511 | 4          | 4          | 6          | 7          | 7          | 1251874.333 |
| F1NLE7 | AIMP1     | 0.6154844 | 0.3844414 |            | 0.02188659 | 0.08683463 | 0.13315780 | 1824211.66 |            |             |
|        |           | 97        | 2         | 0.05344537 | 6          | 2          | 7          | 7          | 1122774    | 97495.66667 |
| F1NM67 | ITGB2     | 1.3396357 | 0.2488904 | 0.42111004 | 0.00294768 | 0.31434668 | 0.02037987 | 805742.666 | 1079401.66 |             |
|        |           | 32        | 17        | 8          | 9          | 3          | 6          | 7          | 7          | 339306.3333 |
| F1NQD9 | RDX       | 1.2111119 | 0.2878094 | 0.24363058 | 0.01076754 | 0.20116273 |            |            |            |             |
|        |           | 24        | 22        | 6          | 8          | 4          | 0.00055016 | 4101450    | 4967315    | 999238.6667 |
| F1NSA8 | RAP1A     | 0.7674534 | 0.0485213 | 0.96989043 | 0.84360517 | 1.26377752 | 0.17464370 | 10959386.3 |            |             |
|        |           | 64        | 86        | 7          | 7          | 3          | 8          | 3          | 8410819    | 10629404    |
| F1NUJ7 | FABP6     | 1.6448510 | 0.0003558 | 1.09491971 | 0.33573770 | 0.66566497 | 0.00461756 | 915250.666 |            |             |
|        |           | 28        | 6         | 6          | 7          | 3          | 9          | 7          | 1505451    | 1002126     |
| F1NV09 | EPCAM     | 1.9687530 | 0.0168985 | 0.88081274 | 0.41765304 | 0.44739626 | 0.01093201 |            |            |             |
|        |           | 38        | 81        | 8          | 4          | 1          | 4          | 401223     | 789909     | 353402.3333 |
| H9L0D7 | WASF2     | 1.6230619 | 0.1338390 | 1.01606437 |            | 0.62601699 | 0.06855245 | 124976.333 | 202844.333 |             |
|        |           | 66        | 27        | 5          | 0.97006436 | 5          | 6          | 3          | 3          | 126984      |
| P35062 | HIST1H2A3 | 1.0372102 | 0.8256832 | 0.96103005 | 0.86994725 | 0.92655283 |            | 6292422.33 | 6526564.66 |             |
|        |           | 06        | 73        | 8          | 9          | 6          | 0.71354855 | 3          | 7          | 6047207     |
| Q5W9C5 | BF1       | 0.8703154 | 0.7348435 | 0.75525584 | 0.58083759 | 0.86779547 | 0.59091803 |            | 2575862.33 |             |
|        |           | 97        | 06        | 7          | 8          | 1          | 4          | 2959688    | 3          | 2235321.667 |
| Q7SX63 | HSPA2     | 1.3135884 | 0.4048487 | 0.61676543 | 0.22664755 | 0.46952713 | 0.02900557 | 732618.333 |            |             |
|        |           | 76        | 2         | 7          | 8          | 8          | 6          | 3          | 962359     | 451853.6667 |
| Q90824 | TNC       | 0.8548722 | 0.7306834 | 0.57186291 | 0.37808480 | 0.66894542 | 0.21771032 |            | 19217838.6 |             |
|        |           | 96        | 24        | 5          | 5          | 9          | 8          | 22480362   | 7          | 12855685.33 |
| Q9DER4 | ZP1       | 2.0477955 | 0.1428157 | 0.99724674 | 0.99409856 | 0.48698550 | 0.17808125 | 964190.666 | 1974465.33 | 961536      |

|        |         |           |           |            |            |            |           |            |        |       |
|--------|---------|-----------|-----------|------------|------------|------------|-----------|------------|--------|-------|
|        |         | 26        | 87        | 1          | 4          | 6          | 9         | 7          | 3      |       |
| R4GKL8 |         | 0.6178575 | 0.0439357 | 0.15140146 | 0.00321063 | 0.24504266 | 8.11659E- | 559023.666 |        |       |
|        | C1QTNF3 | 62        | 34        | 1          | 8          | 1          | 05        | 7          | 345397 | 84637 |

---
