# Supplementary material for: Investigating the growth performance, meat quality, immune function and proteomic profiles of plasmal exosomes in Lactobacillus plantarum-treated broilers with immunological stress
Source: Royal Society of Chemistry journal article supplement (doi:10.1039/d1fo01936h), 2021-01-01
Supplement: d1fo01936h2.pdf [file d1fo01936h2.pdf]

**Table S1 Correlation coefficient (r) for the correlation analysis between DEPs and growth performance, meat quality**

|            | L*      | ADFI    | ADG     | Cooking loss | Shear force | pH45min | pH24h   | a*      | Drip loss | b*      | F:G     |
|------------|---------|---------|---------|--------------|-------------|---------|---------|---------|-----------|---------|---------|
| P01875     | -0.7568 | 0.3372  | -0.1961 | 0.1273       | -0.5535     | -0.7679 | -0.2581 | -0.1967 | 0.4769    | -0.6375 | 0.4015  |
| F1NK40     | 0.1781  | -0.6844 | -0.2902 | 0.0550       | 0.0741      | 0.4196  | -0.3167 | -0.0289 | -0.3296   | 0.2151  | 0.0248  |
| A0A3Q2TZ57 | -0.0867 | -0.3293 | -0.7453 | 0.3212       | -0.5536     | -0.2090 | -0.6137 | -0.5810 | 0.4262    | -0.4004 | 0.6918  |
| A0A1D5PCD2 | 0.4843  | -0.4893 | -0.2668 | 0.2039       | 0.3120      | 0.7184  | -0.1211 | -0.0636 | -0.2905   | 0.3778  | 0.0478  |
| A0A3Q3AJD3 | 0.6648  | -0.2791 | -0.1108 | 0.1952       | 0.4731      | 0.8781  | 0.0969  | -0.0241 | -0.3939   | 0.5823  | -0.0528 |
| A0A3Q2U3V9 | -0.0424 | 0.2161  | 0.7304  | -0.4354      | 0.6665      | 0.5774  | 0.5619  | 0.4689  | -0.8185   | 0.6968  | -0.7212 |
| A0A1D5PH32 | 0.4433  | -0.7108 | -0.6644 | 0.4868       | -0.4437     | -0.0432 | -0.7619 | -0.6670 | 0.4538    | -0.4355 | 0.4019  |
| A0A3Q2UFG5 | 0.0175  | -0.3763 | -0.4169 | 0.2715       | 0.0749      | 0.3886  | -0.1956 | -0.0187 | -0.1317   | 0.1479  | 0.2910  |
| A0A3Q2U540 | -0.1130 | -0.1321 | -0.7501 | 0.1222       | -0.6786     | -0.6394 | -0.7501 | -0.5080 | 0.6330    | -0.7525 | 0.7975  |
| E1BTI7     | -0.0693 | 0.5011  | 0.7390  | -0.6067      | 0.5536      | 0.1350  | 0.5269  | 0.4602  | -0.3688   | 0.2564  | -0.5949 |
| A0A3Q2U0N4 | -0.6042 | -0.1100 | -0.0197 | -0.3478      | -0.5678     | -0.8920 | -0.2999 | -0.1468 | 0.5836    | -0.7471 | 0.0467  |
| A0A3Q2UHT9 | -0.3867 | 0.4662  | 0.8996  | -0.6795      | 0.3917      | -0.0898 | 0.7410  | 0.5778  | -0.2953   | 0.2776  | -0.7560 |
| A0A3Q2UKP2 | 0.2989  | -0.7068 | -0.5330 | 0.3730       | -0.3467     | 0.1112  | -0.4497 | -0.6115 | 0.4755    | -0.2391 | 0.2730  |
| A0A1D5PGI9 | -0.0367 | 0.4477  | 0.7265  | -0.4860      | 0.4660      | 0.3879  | 0.5711  | 0.3447  | -0.8365   | 0.7274  | -0.6143 |
| A0A3Q2UGD4 | -0.8074 | 0.3821  | 0.2324  | 0.0140       | -0.2760     | -0.6683 | 0.0542  | 0.1841  | 0.1902    | -0.4157 | -0.0532 |
| F1NH19     | -0.4346 | 0.4234  | 0.3502  | -0.6609      | -0.0590     | -0.5082 | 0.2255  | 0.1987  | 0.1562    | -0.2349 | -0.1487 |
| A0A1L1RZV0 | -0.3888 | 0.4647  | 0.9005  | -0.6801      | 0.3913      | -0.0890 | 0.7424  | 0.5771  | -0.2952   | 0.2787  | -0.7575 |
| A0A1L1RLL0 | -0.3914 | 0.4586  | 0.9023  | -0.6813      | 0.3939      | -0.0862 | 0.7452  | 0.5817  | -0.2967   | 0.2811  | -0.7618 |
| A0A3Q2TZA4 | 0.2350  | -0.5743 | -0.1438 | 0.1723       | 0.2698      | 0.5835  | 0.0155  | 0.1245  | -0.2628   | 0.3656  | -0.1024 |
| A0A3Q2TUE5 | 0.0136  | -0.1496 | -0.6298 | 0.5351       | -0.8259     | -0.4907 | -0.6928 | -0.9368 | 0.6764    | -0.6190 | 0.6196  |
| P01994     | -0.3547 | 0.5026  | 0.7327  | -0.2774      | 0.1444      | -0.2070 | 0.4654  | 0.2117  | -0.1289   | 0.0612  | -0.5829 |
| O93410     | -0.6350 | 0.3420  | 0.0432  | -0.1130      | -0.3384     | -0.7030 | -0.1681 | -0.0788 | 0.4318    | -0.6363 | 0.1381  |

---

|            |         |         |         |         |         |         |         |         |         |         |         |
|------------|---------|---------|---------|---------|---------|---------|---------|---------|---------|---------|---------|
| F1NSD3     | -0.0116 | -0.3332 | -0.4456 | 0.2215  | -0.6647 | -0.6119 | -0.7293 | -0.4543 | 0.3858  | -0.6239 | 0.3600  |
| A0A1D5NZY0 | -0.5876 | -0.0180 | 0.6496  | -0.5044 | 0.1708  | -0.2823 | 0.5349  | 0.5751  | 0.0493  | -0.0319 | -0.6634 |
| A0A3Q3ANZ2 | 0.5834  | -0.3060 | -0.4295 | -0.0332 | 0.2463  | 0.5843  | -0.2737 | -0.1531 | -0.2291 | 0.2545  | 0.3144  |
| A0A3Q2U324 | 0.4937  | -0.3222 | -0.2065 | 0.0116  | 0.4062  | 0.7478  | -0.0335 | 0.0920  | -0.5078 | 0.5320  | 0.0590  |
| Q90933     | 0.6592  | 0.0474  | -0.1145 | -0.1063 | 0.5075  | 0.7727  | 0.0297  | -0.1016 | -0.3560 | 0.4513  | 0.0981  |
| A0A3Q2U775 | 0.6291  | -0.2518 | -0.1917 | 0.2152  | 0.4354  | 0.8404  | 0.0623  | -0.0483 | -0.3280 | 0.5272  | 0.0508  |
| A0A1D5NXR0 | -0.3086 | 0.1026  | 0.7869  | -0.8819 | 0.3167  | -0.0335 | 0.5668  | 0.4580  | -0.3165 | 0.2821  | -0.7705 |
| P07630     | -0.5145 | 0.1413  | -0.3515 | 0.0030  | -0.3624 | -0.6868 | -0.3764 | 0.2139  | 0.2116  | -0.5482 | 0.4923  |
| A0A3Q2U871 | 0.0807  | -0.4481 | -0.6040 | 0.4130  | -0.6923 | -0.5034 | -0.7743 | -0.7606 | 0.7950  | -0.8003 | 0.4724  |
| A0A1D5PMN6 | -0.4644 | 0.5773  | 0.6795  | -0.6911 | 0.4886  | -0.0302 | 0.6739  | 0.7879  | -0.4560 | 0.3262  | -0.4600 |
| E1BSI4     | -0.3645 | 0.4976  | 0.9176  | -0.6917 | 0.4242  | -0.0272 | 0.7728  | 0.5652  | -0.3486 | 0.3441  | -0.7654 |
| R4GM71     | -0.4343 | 0.3119  | 0.7202  | -0.4799 | 0.0172  | -0.4052 | 0.4244  | 0.2823  | -0.0402 | -0.0387 | -0.6221 |
| P26007     | -0.1467 | -0.7973 | -0.7788 | 0.1920  | -0.5890 | -0.3842 | -0.8081 | -0.3948 | 0.5500  | -0.6579 | 0.5543  |
| Q7T190     | 0.3801  | 0.0260  | -0.7613 | 0.5428  | -0.4101 | 0.0076  | -0.6649 | -0.6870 | 0.1599  | -0.2041 | 0.8064  |
| E1C7C1     | -0.5390 | 0.1857  | -0.1327 | 0.1183  | -0.6454 | -0.8479 | -0.3644 | -0.3826 | 0.6194  | -0.7616 | 0.2578  |
| F1C6X7     | -0.2457 | -0.4493 | -0.6954 | 0.0910  | -0.8059 | -0.7730 | -0.8183 | -0.4942 | 0.7006  | -0.8564 | 0.6202  |
| Q6IEC5     | 0.2168  | -0.6622 | -0.8444 | 0.2402  | -0.4814 | -0.2896 | -0.7555 | -0.4571 | 0.7134  | -0.6670 | 0.6605  |
| A0A3Q2TXS3 | 0.2167  | -0.5221 | -0.9661 | 0.5978  | -0.6701 | -0.2834 | -0.9159 | -0.7065 | 0.5664  | -0.6013 | 0.8289  |
| A0A1D5PGD5 | 0.2850  | -0.3759 | -0.7777 | 0.4131  | -0.4291 | -0.2638 | -0.8030 | -0.3535 | 0.3212  | -0.5051 | 0.6828  |
| P46157     | -0.4093 | 0.6669  | 0.6145  | -0.5834 | 0.3572  | -0.2101 | 0.6127  | 0.5339  | -0.0061 | 0.0115  | -0.3574 |
| E1C3Y3     | -0.2469 | -0.2224 | -0.7697 | 0.5065  | -0.8913 | -0.7926 | -0.8435 | -0.6122 | 0.7292  | -0.8749 | 0.7701  |
| Q70YQ8     | -0.5238 | 0.2566  | 0.2831  | -0.6719 | -0.1630 | -0.5854 | 0.1439  | 0.1595  | 0.2397  | -0.3217 | -0.1332 |
| F1NW23     | 0.5089  | -0.6854 | -0.7074 | 0.3246  | -0.3365 | -0.0241 | -0.7605 | -0.4889 | 0.3656  | -0.4018 | 0.4674  |
| R4GKL8     | 0.4936  | -0.0814 | 0.4285  | -0.2598 | 0.7514  | 0.9325  | 0.5095  | 0.3385  | -0.7395 | 0.8671  | -0.5427 |
| A5HUM6     | -0.6012 | 0.4385  | 0.5763  | -0.4865 | -0.0827 | -0.5603 | 0.3330  | 0.3019  | 0.0030  | -0.1541 | -0.3971 |

---

|            |         |         |         |         |         |         |         |         |         |         |         |
|------------|---------|---------|---------|---------|---------|---------|---------|---------|---------|---------|---------|
| Q5ZL65     | -0.4062 | 0.4776  | 0.8868  | -0.6811 | 0.3795  | -0.1102 | 0.7339  | 0.5787  | -0.2816 | 0.2602  | -0.7354 |
| A0A1D5NTE7 | -0.2114 | -0.7291 | -0.7021 | 0.4363  | -0.5001 | -0.2570 | -0.6890 | -0.2118 | 0.2794  | -0.4379 | 0.4835  |
| A0A3Q2TSK8 | 0.6404  | -0.6584 | -0.5565 | 0.2098  | -0.2736 | 0.2149  | -0.6165 | -0.6635 | 0.1983  | -0.1225 | 0.3035  |
| F1P291     | 0.6652  | -0.2795 | -0.1114 | 0.1955  | 0.4726  | 0.8779  | 0.0965  | -0.0244 | -0.3935 | 0.5822  | -0.0524 |
| A0A3Q2U7A2 | -0.7262 | 0.4355  | 0.4452  | -0.4121 | -0.2493 | -0.6162 | 0.2103  | 0.1380  | 0.0074  | -0.1868 | -0.2491 |
| A0A1L1RMF4 | -0.3183 | 0.1309  | -0.4665 | 0.2688  | -0.7862 | -0.8535 | -0.5738 | -0.5467 | 0.7129  | -0.8131 | 0.5918  |
| F1NDH2     | -0.1317 | 0.1110  | -0.5791 | 0.3530  | -0.6610 | -0.5314 | -0.7090 | -0.4950 | 0.1661  | -0.4609 | 0.6848  |
| A0A3Q2TXN1 | -0.0149 | -0.5638 | -0.8641 | 0.4115  | -0.5279 | -0.1624 | -0.7380 | -0.4617 | 0.3560  | -0.4064 | 0.7208  |
| A0A2H4C5L1 | -0.3884 | 0.4658  | 0.9002  | -0.6800 | 0.3911  | -0.0892 | 0.7422  | 0.5766  | -0.2949 | 0.2784  | -0.7567 |
| Q9DF58     | 0.4981  | -0.0858 | 0.5730  | -0.1878 | 0.6185  | 0.7817  | 0.5911  | 0.1212  | -0.3994 | 0.6953  | -0.7071 |
| A0A1D5P4G6 | -0.3091 | -0.6563 | -0.5946 | 0.1992  | -0.7154 | -0.6736 | -0.8206 | -0.3200 | 0.4922  | -0.7632 | 0.4167  |
| Q5F3I1     | -0.3926 | -0.1936 | -0.6792 | 0.3810  | -0.7937 | -0.8161 | -0.7828 | -0.3390 | 0.5225  | -0.8011 | 0.6961  |
| F1NBT0     | 0.1500  | -0.4430 | -0.6274 | 0.6117  | -0.7489 | -0.4732 | -0.7479 | -0.7864 | 0.7390  | -0.7015 | 0.4872  |
| F1NIW7     | -0.2462 | -0.2075 | -0.8168 | 0.5091  | -0.8603 | -0.7599 | -0.8562 | -0.5687 | 0.6847  | -0.8508 | 0.8282  |
| P09244     | 0.1996  | 0.3911  | 0.7645  | -0.5611 | 0.8582  | 0.5163  | 0.7592  | 0.7763  | -0.6675 | 0.6594  | -0.6858 |
| A0A3Q2TX84 | 0.1897  | -0.3724 | -0.7811 | 0.5356  | -0.3973 | -0.2098 | -0.7686 | -0.2541 | 0.2054  | -0.4242 | 0.6852  |
| F1NWP1     | -0.1827 | 0.4945  | 0.9697  | -0.6732 | 0.6213  | 0.2852  | 0.8598  | 0.5698  | -0.5533 | 0.5879  | -0.8434 |
| F1P2W2     | 0.2389  | 0.5366  | 0.8295  | -0.5662 | 0.8109  | 0.6325  | 0.8219  | 0.5201  | -0.7479 | 0.8194  | -0.7057 |
| Q27J90     | 0.2392  | -0.4323 | -0.9270 | 0.3686  | -0.3784 | -0.0537 | -0.7540 | -0.4201 | 0.3190  | -0.3743 | 0.8305  |
| F1NV09     | -0.3066 | -0.3051 | -0.7533 | 0.4793  | -0.8570 | -0.8144 | -0.8064 | -0.5043 | 0.7793  | -0.9126 | 0.7251  |
| F1NUJ7     | -0.2736 | -0.2066 | -0.7240 | 0.4801  | -0.8990 | -0.8247 | -0.8182 | -0.6074 | 0.7424  | -0.8862 | 0.7289  |
| F1NM67     | -0.1275 | 0.1656  | 0.6202  | -0.2991 | -0.0009 | -0.2982 | 0.3325  | 0.0647  | 0.1382  | -0.0938 | -0.5986 |
| A0A2R3TVM2 | -0.1275 | 0.1656  | 0.6202  | -0.2991 | -0.0009 | -0.2982 | 0.3325  | 0.0647  | 0.1382  | -0.0938 | -0.5986 |
| A0A1L1RWM3 | -0.5823 | 0.4819  | 0.5638  | -0.4429 | 0.1821  | -0.2470 | 0.2983  | 0.5008  | -0.4455 | 0.0944  | -0.3809 |
| F1P201     | 0.3161  | -0.7667 | -0.4803 | 0.5088  | -0.1939 | 0.2644  | -0.4077 | -0.3722 | 0.1936  | -0.0623 | 0.1775  |

---

|            |         |         |         |         |         |         |         |         |         |         |         |
|------------|---------|---------|---------|---------|---------|---------|---------|---------|---------|---------|---------|
| Q5ZKY7     | 0.5405  | -0.0430 | 0.1690  | -0.0875 | 0.6047  | 0.8933  | 0.2208  | 0.0151  | -0.5648 | 0.6521  | -0.2539 |
| Q90944     | -0.3751 | 0.5271  | 0.9050  | -0.7031 | 0.4436  | -0.0023 | 0.7918  | 0.5735  | -0.3587 | 0.3656  | -0.7383 |
| E1BZN8     | -0.3952 | 0.0905  | 0.8434  | -0.5449 | 0.3139  | 0.1160  | 0.7068  | 0.3892  | -0.3281 | 0.4183  | -0.8555 |
| A0A1D5PPL7 | -0.5094 | 0.1130  | 0.5641  | -0.3855 | -0.0941 | -0.5440 | 0.3105  | 0.2814  | 0.2152  | -0.2616 | -0.5240 |
| A0A173G7D2 | 0.6448  | -0.2978 | -0.0611 | 0.1641  | 0.5021  | 0.8603  | 0.0668  | 0.1012  | -0.5648 | 0.6290  | -0.1141 |
| R4GJX3     | -0.6175 | 0.1603  | 0.7700  | -0.6129 | 0.2480  | -0.2383 | 0.5997  | 0.6682  | -0.2196 | 0.1293  | -0.7212 |
| A0A0K0PUH6 | -0.5772 | 0.5967  | 0.7686  | -0.6089 | 0.3274  | -0.1769 | 0.6124  | 0.5369  | -0.2688 | 0.1468  | -0.5522 |
| A0A3Q2TZU8 | -0.3867 | 0.0300  | 0.8336  | -0.6011 | 0.4991  | 0.1567  | 0.7585  | 0.7056  | -0.3698 | 0.4134  | -0.3867 |
| A0A3Q2UGF7 | 0.0300  | 0.8336  | -0.6011 | 0.4991  | 0.1567  | 0.7585  | 0.7056  | -0.3698 | 0.4134  | -0.8649 | -0.1023 |
| F1NPS5     | 0.5532  | 0.6368  | -0.4374 | 0.2025  | -0.1531 | 0.3856  | 0.2762  | -0.3146 | 0.1714  | -0.4593 | -0.3884 |
| A0A3Q2U504 | 0.4658  | 0.9002  | -0.6800 | 0.3911  | -0.0892 | 0.7422  | 0.5766  | -0.2949 | 0.2784  | -0.7567 | -0.3423 |
| F1P386     | 0.4824  | -0.5286 | -0.1551 | -0.1546 | 0.4668  | 0.6523  | 0.0683  | 0.2056  | -0.1439 | 0.3220  | -0.0654 |
| E1C857     | -0.5978 | 0.0941  | -0.4057 | 0.2530  | -0.6564 | -0.8316 | -0.5897 | -0.2831 | 0.5175  | -0.8174 | 0.5202  |
| F1NSM7     | -0.4963 | 0.3181  | 0.5450  | -0.3842 | -0.1542 | -0.5358 | 0.2067  | 0.1968  | -0.0770 | -0.1316 | -0.4248 |
| A0A1D5PXN3 | -0.5576 | 0.4125  | 0.4681  | -0.7410 | 0.1131  | -0.4123 | 0.4036  | 0.4641  | 0.0260  | -0.1071 | -0.2738 |
| A0A3Q2U4V6 | 0.2141  | -0.4209 | -0.9170 | 0.6418  | -0.4912 | -0.1317 | -0.8469 | -0.4609 | 0.2360  | -0.3925 | 0.8086  |
| A0A1D5PMA3 | 0.1935  | -0.0399 | -0.7937 | 0.5240  | -0.4818 | -0.4252 | -0.6681 | -0.4194 | 0.6517  | -0.6770 | 0.8408  |
| A0A1L1RYU0 | -0.1959 | 0.1595  | 0.6993  | -0.4083 | 0.1606  | -0.2010 | 0.5346  | 0.2279  | 0.1962  | -0.0368 | -0.6782 |
| Q2MJT5     | 0.3802  | -0.5870 | -0.6002 | 0.6819  | -0.4771 | -0.0120 | -0.7000 | -0.7161 | 0.3599  | -0.3399 | 0.3705  |
| F1NEB3     | -0.0491 | -0.2851 | -0.8480 | 0.4810  | -0.7597 | -0.5078 | -0.9217 | -0.5901 | 0.3637  | -0.6053 | 0.8155  |
| Q90631     | -0.1882 | 0.4959  | 0.6728  | -0.5958 | 0.5838  | 0.2812  | 0.8213  | 0.5060  | -0.2413 | 0.4408  | -0.5098 |
| Q7SX63     | -0.5188 | 0.5091  | 0.6182  | -0.5543 | 0.1434  | -0.2998 | 0.4029  | 0.5024  | -0.4014 | 0.1462  | -0.4224 |
| E1BY44     | -0.4696 | 0.4915  | 0.8045  | -0.6224 | 0.2226  | -0.2317 | 0.5757  | 0.4853  | -0.3330 | 0.2010  | -0.6373 |
| P87362     | -0.2776 | 0.5103  | 0.9286  | -0.6529 | 0.4128  | 0.0785  | 0.7469  | 0.4474  | -0.4839 | 0.4677  | -0.7835 |
| Q6PW00     | -0.2148 | 0.1912  | -0.2193 | 0.0946  | -0.4824 | -0.7624 | -0.3203 | -0.2203 | 0.6739  | -0.7385 | 0.3438  |

|        |         |        |        |         |        |         |        |        |         |        |         |
|--------|---------|--------|--------|---------|--------|---------|--------|--------|---------|--------|---------|
| Q9W6V5 | -0.3983 | 0.4487 | 0.8749 | -0.6533 | 0.3333 | -0.1539 | 0.6886 | 0.5453 | -0.2559 | 0.2183 | -0.7354 |
| F1NSA8 | -0.4009 | 0.4210 | 0.8012 | -0.6363 | 0.3718 | -0.1193 | 0.6027 | 0.6721 | -0.4460 | 0.2770 | -0.6664 |

**Table S2 P value for the correlation analysis between DEPs and growth performance, meat quality**

|            | L*     | ADFI   | ADG    | Cooking loss | Shear force | pH45min | pH24h  | a*     | Drip loss | b*     | F:G    |
|------------|--------|--------|--------|--------------|-------------|---------|--------|--------|-----------|--------|--------|
| P01875     | 0.0182 | 0.3749 | 0.6132 | 0.7442       | 0.1221      | 0.0157  | 0.5026 | 0.6119 | 0.1943    | 0.0647 | 0.2841 |
| F1NK40     | 0.6466 | 0.0420 | 0.4488 | 0.8883       | 0.8496      | 0.2608  | 0.4064 | 0.9412 | 0.3864    | 0.5783 | 0.9495 |
| A0A3Q2TZ57 | 0.8246 | 0.3868 | 0.0212 | 0.3993       | 0.1220      | 0.5895  | 0.0788 | 0.1008 | 0.2526    | 0.2856 | 0.0389 |
| A0A1D5PCD2 | 0.1865 | 0.1813 | 0.4877 | 0.5987       | 0.4137      | 0.0292  | 0.7564 | 0.8708 | 0.4483    | 0.3161 | 0.9028 |
| A0A3Q3AJD3 | 0.0507 | 0.4670 | 0.7765 | 0.6147       | 0.1984      | 0.0018  | 0.8042 | 0.9510 | 0.2942    | 0.0999 | 0.8927 |
| A0A3Q2U3V9 | 0.9137 | 0.5765 | 0.0254 | 0.2414       | 0.0500      | 0.1035  | 0.1154 | 0.2029 | 0.0070    | 0.0370 | 0.0283 |
| A0A1D5PH32 | 0.2320 | 0.0318 | 0.0509 | 0.1839       | 0.2315      | 0.9122  | 0.0170 | 0.0497 | 0.2198    | 0.2413 | 0.2836 |
| A0A3Q2UFG5 | 0.9643 | 0.3182 | 0.2643 | 0.4797       | 0.8481      | 0.3013  | 0.6140 | 0.9620 | 0.7356    | 0.7041 | 0.4475 |
| A0A3Q2U540 | 0.7723 | 0.7348 | 0.0199 | 0.7541       | 0.0445      | 0.0637  | 0.0199 | 0.1627 | 0.0673    | 0.0193 | 0.0100 |
| E1BTI7     | 0.8593 | 0.1694 | 0.0229 | 0.0832       | 0.1221      | 0.7292  | 0.1450 | 0.2125 | 0.3287    | 0.5054 | 0.0910 |
| A0A3Q2U0N4 | 0.0848 | 0.7782 | 0.9598 | 0.3590       | 0.1108      | 0.0012  | 0.4330 | 0.7062 | 0.0990    | 0.0207 | 0.9050 |
| A0A3Q2UHT9 | 0.3039 | 0.2059 | 0.0010 | 0.0441       | 0.2972      | 0.8183  | 0.0224 | 0.1032 | 0.4404    | 0.4696 | 0.0184 |
| A0A3Q2UKP2 | 0.4347 | 0.0332 | 0.1395 | 0.3228       | 0.3607      | 0.7759  | 0.2245 | 0.0802 | 0.1958    | 0.5355 | 0.4772 |
| A0A1D5PGI9 | 0.9254 | 0.2269 | 0.0266 | 0.1847       | 0.2062      | 0.3023  | 0.1083 | 0.3636 | 0.0049    | 0.0264 | 0.0784 |
| A0A3Q2UGD4 | 0.0085 | 0.3102 | 0.5473 | 0.9715       | 0.4722      | 0.0491  | 0.8898 | 0.6353 | 0.6240    | 0.2658 | 0.8920 |
| F1NH19     | 0.2424 | 0.2562 | 0.3556 | 0.0526       | 0.8801      | 0.1624  | 0.5596 | 0.6084 | 0.6881    | 0.5428 | 0.7027 |
| A0A1L1RZV0 | 0.3011 | 0.2075 | 0.0009 | 0.0438       | 0.2977      | 0.8200  | 0.0220 | 0.1038 | 0.4407    | 0.4677 | 0.0181 |
| A0A1L1RLL0 | 0.2975 | 0.2144 | 0.0009 | 0.0433       | 0.2942      | 0.8256  | 0.0212 | 0.1003 | 0.4382    | 0.4637 | 0.0171 |

---

|            |        |        |        |        |        |        |        |        |        |        |        |
|------------|--------|--------|--------|--------|--------|--------|--------|--------|--------|--------|--------|
| A0A3Q2TZA4 | 0.5427 | 0.1059 | 0.7121 | 0.6576 | 0.4826 | 0.0991 | 0.9685 | 0.7496 | 0.4945 | 0.3333 | 0.7933 |
| A0A3Q2TUE5 | 0.9723 | 0.7009 | 0.0691 | 0.1377 | 0.0061 | 0.1798 | 0.0386 | 0.0002 | 0.0454 | 0.0755 | 0.0751 |
| P01994     | 0.3490 | 0.1679 | 0.0247 | 0.4698 | 0.7110 | 0.5931 | 0.2068 | 0.5845 | 0.7409 | 0.8758 | 0.0995 |
| O93410     | 0.0661 | 0.3676 | 0.9121 | 0.7722 | 0.3731 | 0.0346 | 0.6655 | 0.8403 | 0.2458 | 0.0654 | 0.7232 |
| F1NSD3     | 0.9764 | 0.3809 | 0.2293 | 0.5668 | 0.0508 | 0.0799 | 0.0258 | 0.2192 | 0.3052 | 0.0725 | 0.3412 |
| A0A1D5NZY0 | 0.0962 | 0.9633 | 0.0583 | 0.1661 | 0.6604 | 0.4617 | 0.1378 | 0.1052 | 0.8997 | 0.9351 | 0.0514 |
| A0A3Q3ANZ2 | 0.0992 | 0.4232 | 0.2486 | 0.9325 | 0.5228 | 0.0985 | 0.4760 | 0.6942 | 0.5533 | 0.5087 | 0.4099 |
| A0A3Q2U324 | 0.1767 | 0.3978 | 0.5939 | 0.9763 | 0.2780 | 0.0205 | 0.9319 | 0.8139 | 0.1628 | 0.1404 | 0.8802 |
| Q90933     | 0.0535 | 0.9036 | 0.7693 | 0.7855 | 0.1631 | 0.0146 | 0.9394 | 0.7948 | 0.3471 | 0.2227 | 0.8018 |
| A0A3Q2U775 | 0.0695 | 0.5134 | 0.6213 | 0.5781 | 0.2415 | 0.0046 | 0.8735 | 0.9017 | 0.3889 | 0.1447 | 0.8968 |
| A0A1D5NXR0 | 0.4190 | 0.7928 | 0.0119 | 0.0017 | 0.4064 | 0.9319 | 0.1115 | 0.2150 | 0.4067 | 0.4621 | 0.0151 |
| P07630     | 0.1565 | 0.7168 | 0.3535 | 0.9940 | 0.3378 | 0.0410 | 0.3181 | 0.5805 | 0.5846 | 0.1265 | 0.1782 |
| A0A3Q2U871 | 0.8365 | 0.2265 | 0.0850 | 0.2693 | 0.0388 | 0.1671 | 0.0143 | 0.0173 | 0.0104 | 0.0096 | 0.1991 |
| A0A1D5PMN6 | 0.2079 | 0.1036 | 0.0441 | 0.0393 | 0.1820 | 0.9385 | 0.0466 | 0.0117 | 0.2173 | 0.3917 | 0.2128 |
| E1BSI4     | 0.3348 | 0.1729 | 0.0005 | 0.0390 | 0.2551 | 0.9447 | 0.0146 | 0.1128 | 0.3579 | 0.3646 | 0.0162 |
| R4GM71     | 0.2428 | 0.4139 | 0.0286 | 0.1911 | 0.9649 | 0.2794 | 0.2549 | 0.4618 | 0.9183 | 0.9212 | 0.0736 |
| P26007     | 0.7065 | 0.0101 | 0.0134 | 0.6206 | 0.0952 | 0.3073 | 0.0084 | 0.2930 | 0.1250 | 0.0541 | 0.1215 |
| Q7T190     | 0.3130 | 0.9470 | 0.0172 | 0.1311 | 0.2730 | 0.9845 | 0.0507 | 0.0409 | 0.6811 | 0.5983 | 0.0087 |
| E1C7C1     | 0.1343 | 0.6325 | 0.7336 | 0.7619 | 0.0605 | 0.0039 | 0.3349 | 0.3095 | 0.0753 | 0.0171 | 0.5031 |
| F1C6X7     | 0.5240 | 0.2250 | 0.0375 | 0.8159 | 0.0087 | 0.0146 | 0.0070 | 0.1763 | 0.0355 | 0.0032 | 0.0748 |
| Q6IEC5     | 0.5754 | 0.0520 | 0.0042 | 0.5335 | 0.1895 | 0.4497 | 0.0186 | 0.2161 | 0.0309 | 0.0497 | 0.0528 |
| A0A3Q2TXS3 | 0.5755 | 0.1493 | 0.0000 | 0.0891 | 0.0483 | 0.4599 | 0.0005 | 0.0334 | 0.1118 | 0.0867 | 0.0057 |
| A0A1D5PGD5 | 0.4572 | 0.3188 | 0.0136 | 0.2691 | 0.2491 | 0.4927 | 0.0092 | 0.3507 | 0.3994 | 0.1655 | 0.0427 |
| P46157     | 0.2740 | 0.0498 | 0.0783 | 0.0992 | 0.3454 | 0.5873 | 0.0794 | 0.1388 | 0.9876 | 0.9766 | 0.3451 |
| E1C3Y3     | 0.5219 | 0.5651 | 0.0153 | 0.1641 | 0.0013 | 0.0108 | 0.0043 | 0.0797 | 0.0258 | 0.0020 | 0.0152 |

|            |        |        |        |        |        |        |        |        |        |        |        |
|------------|--------|--------|--------|--------|--------|--------|--------|--------|--------|--------|--------|
| Q70YQ8     | 0.1478 | 0.5050 | 0.4605 | 0.0474 | 0.6752 | 0.0977 | 0.7119 | 0.6819 | 0.5346 | 0.3985 | 0.7326 |
| F1NW23     | 0.1617 | 0.0416 | 0.0330 | 0.3941 | 0.3760 | 0.9510 | 0.0174 | 0.1817 | 0.3332 | 0.2837 | 0.2046 |
| R4GKL8     | 0.1769 | 0.8350 | 0.2499 | 0.4995 | 0.0196 | 0.0002 | 0.1612 | 0.3729 | 0.0228 | 0.0025 | 0.1311 |
| A5HUM6     | 0.0869 | 0.2377 | 0.1044 | 0.1841 | 0.8325 | 0.1167 | 0.3813 | 0.4297 | 0.9938 | 0.6921 | 0.2900 |
| Q5ZL65     | 0.2780 | 0.1935 | 0.0014 | 0.0434 | 0.3137 | 0.7778 | 0.0244 | 0.1026 | 0.4629 | 0.4989 | 0.0239 |
| A0A1D5NTE7 | 0.5850 | 0.0258 | 0.0350 | 0.2404 | 0.1704 | 0.5045 | 0.0401 | 0.5844 | 0.4666 | 0.2384 | 0.1873 |
| A0A3Q2TSK8 | 0.0632 | 0.0538 | 0.1196 | 0.5879 | 0.4762 | 0.5788 | 0.0771 | 0.0513 | 0.6090 | 0.7535 | 0.4273 |
| F1P291     | 0.0506 | 0.4664 | 0.7754 | 0.6143 | 0.1990 | 0.0019 | 0.8049 | 0.9503 | 0.2947 | 0.1000 | 0.8935 |
| A0A3Q2U7A2 | 0.1884 | 0.1435 | 0.6903 | 0.6912 | 0.2052 | 0.0569 | 0.8615 | 0.5957 | 0.7118 | 0.3980 | 0.8672 |
| A0A1L1RMF4 | 0.0267 | 0.2413 | 0.2297 | 0.2704 | 0.5177 | 0.0772 | 0.5871 | 0.7233 | 0.9850 | 0.6303 | 0.5180 |
| F1NDH2     | 0.4038 | 0.7371 | 0.2056 | 0.4844 | 0.0120 | 0.0034 | 0.1062 | 0.1277 | 0.0311 | 0.0077 | 0.0932 |
| A0A3Q2TXN1 | 0.7355 | 0.7762 | 0.1023 | 0.3514 | 0.0526 | 0.1409 | 0.0325 | 0.1754 | 0.6692 | 0.2118 | 0.0418 |
| A0A2H4C5L1 | 0.9697 | 0.1138 | 0.0027 | 0.2711 | 0.1440 | 0.6764 | 0.0232 | 0.2110 | 0.3471 | 0.2777 | 0.0285 |
| Q9DF58     | 0.3016 | 0.2063 | 0.0009 | 0.0439 | 0.2979 | 0.8194 | 0.0220 | 0.1041 | 0.4411 | 0.4682 | 0.0183 |
| A0A1D5P4G6 | 0.4183 | 0.0549 | 0.0913 | 0.6073 | 0.0303 | 0.0467 | 0.0067 | 0.4013 | 0.1783 | 0.0167 | 0.2645 |
| Q5F3I1     | 0.2960 | 0.6177 | 0.0442 | 0.3117 | 0.0107 | 0.0073 | 0.0126 | 0.3721 | 0.1490 | 0.0095 | 0.0373 |
| F1NBT0     | 0.7000 | 0.2324 | 0.0705 | 0.0800 | 0.0202 | 0.1983 | 0.0205 | 0.0119 | 0.0229 | 0.0352 | 0.1834 |
| F1NIW7     | 0.5231 | 0.5922 | 0.0072 | 0.1616 | 0.0029 | 0.0175 | 0.0032 | 0.1100 | 0.0418 | 0.0036 | 0.0058 |
| P09244     | 0.6066 | 0.2980 | 0.0164 | 0.1160 | 0.0031 | 0.1548 | 0.0177 | 0.0139 | 0.0495 | 0.0533 | 0.0414 |
| A0A3Q2TX84 | 0.6250 | 0.3237 | 0.0130 | 0.1372 | 0.2897 | 0.5880 | 0.0155 | 0.5093 | 0.5960 | 0.2551 | 0.0417 |
| F1NWP1     | 0.6381 | 0.1759 | 0.0000 | 0.0469 | 0.0741 | 0.4569 | 0.0030 | 0.1092 | 0.1222 | 0.0959 | 0.0043 |
| F1P2W2     | 0.5358 | 0.1363 | 0.0057 | 0.1120 | 0.0080 | 0.0676 | 0.0066 | 0.1512 | 0.0205 | 0.0069 | 0.0336 |
| Q27J90     | 0.5354 | 0.2453 | 0.0003 | 0.3290 | 0.3153 | 0.8908 | 0.0189 | 0.2603 | 0.4027 | 0.3210 | 0.0056 |
| F1NV09     | 0.4223 | 0.4246 | 0.0191 | 0.1917 | 0.0032 | 0.0075 | 0.0086 | 0.1662 | 0.0133 | 0.0006 | 0.0271 |
| F1NUJ7     | 0.4763 | 0.5939 | 0.0274 | 0.1909 | 0.0010 | 0.0062 | 0.0070 | 0.0828 | 0.0220 | 0.0015 | 0.0259 |

---

|            |        |        |        |        |        |        |        |        |        |        |        |
|------------|--------|--------|--------|--------|--------|--------|--------|--------|--------|--------|--------|
| F1NM67     | 0.7438 | 0.6703 | 0.0747 | 0.4342 | 0.9982 | 0.4357 | 0.3820 | 0.8686 | 0.7229 | 0.8104 | 0.0886 |
| A0A2R3TVM2 | 0.0999 | 0.1890 | 0.1139 | 0.2325 | 0.6391 | 0.5217 | 0.4355 | 0.1697 | 0.2295 | 0.8091 | 0.3119 |
| A0A1L1RWM3 | 0.4073 | 0.0159 | 0.1907 | 0.1619 | 0.6172 | 0.4917 | 0.2761 | 0.3239 | 0.6176 | 0.8736 | 0.6477 |
| F1P201     | 0.1330 | 0.9126 | 0.6637 | 0.8228 | 0.0845 | 0.0012 | 0.5680 | 0.9692 | 0.1131 | 0.0570 | 0.5098 |
| Q5ZKY7     | 0.1970 | 0.4871 | 0.1006 | 0.1568 | 0.6259 | 0.3100 | 0.1532 | 0.1294 | 0.6013 | 0.6646 | 0.1955 |
| Q90944     | 0.3198 | 0.1448 | 0.0008 | 0.0346 | 0.2317 | 0.9952 | 0.0110 | 0.1064 | 0.3431 | 0.3333 | 0.0231 |
| E1BZN8     | 0.2924 | 0.8168 | 0.0043 | 0.1293 | 0.4108 | 0.7663 | 0.0333 | 0.3005 | 0.3887 | 0.2625 | 0.0033 |
| A0A1D5PPL7 | 0.1613 | 0.7723 | 0.1136 | 0.3055 | 0.8097 | 0.1300 | 0.4161 | 0.4632 | 0.5782 | 0.4965 | 0.1476 |
| A0A173G7D2 | 0.0608 | 0.4364 | 0.8760 | 0.6731 | 0.1684 | 0.0029 | 0.8644 | 0.7957 | 0.1130 | 0.0696 | 0.7700 |
| R4GJX3     | 0.0764 | 0.6804 | 0.0152 | 0.0793 | 0.5200 | 0.5369 | 0.0879 | 0.0492 | 0.5702 | 0.7403 | 0.0283 |
| A0A0K0PUH6 | 0.1037 | 0.0898 | 0.0155 | 0.0818 | 0.3898 | 0.6490 | 0.0796 | 0.1361 | 0.4843 | 0.7062 | 0.1231 |
| A0A3Q2TZU8 | 0.3039 | 0.9390 | 0.0052 | 0.0869 | 0.1714 | 0.6872 | 0.0178 | 0.0337 | 0.3273 | 0.2687 | 0.0026 |
| A0A3Q2UGF7 | 0.7934 | 0.1223 | 0.0652 | 0.2390 | 0.6012 | 0.6941 | 0.3054 | 0.4718 | 0.4097 | 0.6592 | 0.2136 |
| F1NPS5     | 0.3016 | 0.2063 | 0.0009 | 0.0439 | 0.2979 | 0.8194 | 0.0220 | 0.1041 | 0.4411 | 0.4682 | 0.0183 |
| A0A3Q2U504 | 0.3672 | 0.2082 | 0.0003 | 0.0394 | 0.2253 | 0.9810 | 0.0128 | 0.0931 | 0.3544 | 0.3560 | 0.0105 |
| F1P386     | 0.2631 | 0.2038 | 0.0019 | 0.0484 | 0.3589 | 0.7151 | 0.0317 | 0.1177 | 0.4994 | 0.5481 | 0.0262 |
| E1C857     | 0.0891 | 0.8096 | 0.2786 | 0.5112 | 0.0548 | 0.0055 | 0.0947 | 0.4604 | 0.1536 | 0.0071 | 0.1511 |
| F1NSM7     | 0.1742 | 0.4042 | 0.1292 | 0.3073 | 0.6921 | 0.1371 | 0.5937 | 0.6118 | 0.8438 | 0.7357 | 0.2544 |
| A0A1D5PXN3 | 0.1188 | 0.2699 | 0.2038 | 0.0223 | 0.7720 | 0.2702 | 0.2814 | 0.2082 | 0.9471 | 0.7840 | 0.4759 |
| A0A3Q2U4V6 | 0.5801 | 0.2593 | 0.0005 | 0.0624 | 0.1793 | 0.7355 | 0.0040 | 0.2118 | 0.5411 | 0.2961 | 0.0083 |
| A0A1D5PMA3 | 0.6180 | 0.9189 | 0.0107 | 0.1476 | 0.1891 | 0.2539 | 0.0492 | 0.2611 | 0.0572 | 0.0452 | 0.0045 |
| A0A1L1RYU0 | 0.6135 | 0.6820 | 0.0360 | 0.2753 | 0.6797 | 0.6040 | 0.1381 | 0.5554 | 0.6129 | 0.9250 | 0.0446 |
| Q2MJT5     | 0.3128 | 0.0966 | 0.0875 | 0.0431 | 0.1940 | 0.9756 | 0.0358 | 0.0300 | 0.3415 | 0.3708 | 0.3263 |
| F1NEB3     | 0.9001 | 0.4571 | 0.0039 | 0.1899 | 0.0175 | 0.1628 | 0.0004 | 0.0944 | 0.3360 | 0.0841 | 0.0074 |
| Q90631     | 0.6277 | 0.1746 | 0.0471 | 0.0904 | 0.0989 | 0.4635 | 0.0066 | 0.1646 | 0.5316 | 0.2350 | 0.1609 |

|        |        |        |        |        |        |        |        |        |        |        |        |
|--------|--------|--------|--------|--------|--------|--------|--------|--------|--------|--------|--------|
| Q7SX63 | 0.1524 | 0.1615 | 0.0760 | 0.1214 | 0.7128 | 0.4332 | 0.2823 | 0.1681 | 0.2842 | 0.7075 | 0.2574 |
| E1BY44 | 0.2022 | 0.1790 | 0.0089 | 0.0735 | 0.5649 | 0.5486 | 0.1048 | 0.1854 | 0.3813 | 0.6041 | 0.0649 |
| P87362 | 0.4696 | 0.1604 | 0.0003 | 0.0566 | 0.2695 | 0.8408 | 0.0208 | 0.2273 | 0.1868 | 0.2043 | 0.0125 |
| Q6PW00 | 0.5789 | 0.6222 | 0.5708 | 0.8087 | 0.1884 | 0.0169 | 0.4007 | 0.5689 | 0.0466 | 0.0230 | 0.3650 |
| Q9W6V5 | 0.2883 | 0.2257 | 0.0020 | 0.0564 | 0.3808 | 0.6926 | 0.0403 | 0.1289 | 0.5063 | 0.5726 | 0.0240 |
| F1NSA8 | 0.2849 | 0.2592 | 0.0094 | 0.0654 | 0.3244 | 0.7598 | 0.0859 | 0.0474 | 0.2289 | 0.4706 | 0.0500 |

**Table S3 Correlation coefficient (r) for the correlation analysis between DEPs and plasmal parameters**

|            | IL-1 $\beta$ | IL-10   | IL-6    | TNF- $\alpha$ | IgM     | IgG     | IgA     |
|------------|--------------|---------|---------|---------------|---------|---------|---------|
| A0A1D5NZY0 | -0.0669      | 0.5858  | 0.4686  | -0.1674       | 0.2315  | 0.4167  | 0.0234  |
| F1NK40     | -0.5833      | -0.0333 | -0.3833 | -0.6833       | -0.1564 | -0.0832 | 0.4322  |
| P01875     | 0.4500       | -0.3833 | 0.8000  | 0.7333        | 0.5086  | 0.6754  | 0.2016  |
| A0A1D5PCD2 | -0.3333      | -0.1833 | -0.5333 | -0.2500       | -0.5039 | -0.1712 | -0.5781 |
| A0A1D5PH32 | 0.0333       | -0.2333 | -0.4667 | 0.0667        | -0.3802 | 0.1521  | -0.1133 |
| Q90933     | -0.3833      | 0.1167  | -0.4500 | -0.2000       | -0.4727 | -0.2369 | -0.3583 |
| E1BTI7     | -0.0500      | 0.1500  | 0.3000  | 0.1000        | -0.0010 | -0.3499 | 0.3784  |
| P68139     | 0.4404       | -0.7156 | 0.2477  | 0.3853        | 0.0747  | 0.7852  | 0.3582  |
| Q7SX63     | 0.0669       | -0.0167 | 0.6193  | -0.0335       | 0.1052  | -0.0127 | 0.6170  |
| Q6Q1Q8     | 0.7982       | -0.3578 | 0.3853  | 0.5505        | 0.0747  | 0.7852  | 0.3582  |
| A0A3Q2TZA4 | -0.2833      | -0.2333 | -0.5500 | -0.2167       | -0.3654 | -0.2184 | -0.6411 |
| P09244     | 0.0000       | 0.5523  | -0.0167 | -0.2343       | -0.1389 | -0.5882 | 0.2504  |

---

|            |         |         |         |         |         |         |         |
|------------|---------|---------|---------|---------|---------|---------|---------|
| A0A3Q3ANZ2 | -0.3333 | 0.0333  | -0.6500 | -0.3000 | -0.7104 | -0.0863 | -0.3482 |
| F1NW23     | -0.0167 | -0.2500 | -0.3667 | -0.0667 | -0.5937 | 0.1315  | 0.0418  |
| O93410     | 0.4500  | -0.2667 | 0.8000  | 0.8167  | 0.3509  | 0.4483  | 0.3795  |
| F1NQD9     | 0.3193  | 0.1681  | 0.6975  | 0.1681  | 0.3571  | 0.2426  | 0.6088  |
| E1C7C1     | 0.3333  | -0.4167 | 0.6833  | 0.7167  | 0.4390  | 0.4968  | 0.3860  |
| A0A1D5PGD5 | 0.3667  | -0.3167 | -0.1333 | 0.2500  | -0.4482 | 0.4848  | 0.4527  |
| A5HUM6     | 0.2008  | 0.0502  | 0.6862  | 0.1004  | 0.3466  | -0.0307 | 0.5054  |
| A0A3Q2U7A2 | 0.1667  | 0.0500  | 0.8333  | 0.2500  | 0.3715  | 0.1462  | 0.3909  |
| P01994     | -0.0167 | -0.2167 | 0.4667  | 0.2333  | 0.4778  | -0.1576 | 0.3701  |
| A0A3Q2U0N4 | 0.3167  | 0.0667  | 0.6167  | 0.2167  | 0.0614  | 0.1931  | 0.2942  |
| A0A3Q2UGD4 | 0.2667  | -0.2333 | 0.7500  | 0.4333  | 0.5397  | 0.4561  | 0.4551  |
| A0A3Q2UFG5 | -0.3000 | -0.1500 | -0.3667 | -0.1167 | -0.2782 | 0.1931  | -0.6136 |
| A0A3Q2U3V9 | -0.8333 | 0.0667  | -0.0500 | -0.4667 | -0.1931 | -0.3776 | -0.0291 |
| P26007     | 0.1000  | 0.0500  | 0.0333  | -0.1167 | -0.4800 | 0.3770  | -0.2584 |
| A0A1D5NXR0 | -0.4167 | 0.2000  | 0.4167  | -0.4167 | -0.1173 | -0.5907 | 0.0038  |
| A0A1D5P4G6 | 0.0667  | -0.1500 | 0.3333  | -0.0500 | -0.3721 | 0.4916  | 0.2976  |
| A0A1D5P7D0 | 0.0500  | -0.1000 | -0.4500 | -0.1167 | -0.5523 | -0.0063 | -0.0144 |
| R4GM71     | 0.1506  | 0.0669  | 0.6193  | 0.1339  | 0.3294  | -0.2646 | 0.4180  |
| A0A173G7D2 | -0.5462 | 0.1681  | -0.5630 | -0.7311 | -0.5038 | -0.2888 | -0.2956 |
| E1BY44     | 0.0000  | 0.0000  | 0.6527  | -0.1172 | 0.2375  | -0.2524 | 0.4249  |
| Q70YQ8     | 0.3833  | 0.1167  | 0.7500  | 0.3333  | 0.0878  | -0.0625 | 0.1944  |
| F1P2W2     | -0.3849 | 0.3849  | 0.0837  | -0.4184 | -0.0093 | -0.6268 | 0.0239  |
| F1NWN4     | -0.7029 | 0.2510  | -0.5858 | -0.7029 | -0.2936 | -0.1448 | -0.4515 |
| P07630     | 0.7531  | 0.0167  | 0.8201  | 0.3849  | -0.0639 | 0.6551  | 0.6953  |
| Q90593     | 0.5356  | -0.3013 | -0.1004 | 0.3849  | -0.1670 | 0.6232  | 0.0677  |
| A0A3Q2U871 | 0.5000  | -0.2333 | 0.2667  | 0.7000  | -0.0194 | 0.3368  | 0.0283  |

---

|            |         |         |         |         |         |         |         |
|------------|---------|---------|---------|---------|---------|---------|---------|
| F1P291     | -0.3333 | 0.4667  | -0.5667 | -0.5000 | -0.5858 | -0.4587 | -0.6577 |
| Q6IEC5     | 0.3000  | 0.0333  | -0.2500 | 0.3333  | -0.4055 | 0.2278  | -0.2224 |
| A0A3Q2U540 | 0.6167  | -0.3667 | 0.2667  | 0.4167  | -0.1688 | 0.5621  | 0.2202  |
| B5BSS3     | 0.0730  | 0.4199  | 0.5842  | 0.0913  | 0.2651  | -0.4651 | 0.2005  |
| F1NEB3     | 0.3833  | -0.5333 | 0.0167  | 0.3167  | -0.2567 | 0.7582  | 0.3858  |
| A0A3Q2U4V6 | 0.3445  | -0.3698 | -0.0252 | 0.1597  | -0.3662 | 0.6428  | 0.1696  |
| F1NWP1     | -0.4167 | 0.3333  | 0.1500  | -0.2167 | 0.1934  | -0.5802 | 0.0020  |
| A0A3Q2U324 | -0.4333 | 0.0167  | -0.4833 | -0.5500 | -0.6291 | -0.1820 | -0.3957 |
| A0A2R3TVM2 | 0.0333  | -0.2833 | 0.8167  | 0.0833  | 0.0506  | 0.1509  | 0.6395  |
| Q5ZMT0     | -0.2167 | 0.0167  | 0.1500  | 0.0333  | 0.2625  | -0.3737 | 0.3082  |
| E1C7T9     | 0.7364  | -0.0837 | 0.6025  | 0.6025  | 0.3012  | 0.6146  | 0.0880  |
| F1NSA8     | -0.1681 | 0.2269  | 0.4034  | -0.3782 | 0.0869  | -0.2886 | 0.4901  |
| E1BZN8     | -0.5021 | 0.4519  | 0.1506  | -0.4017 | 0.2466  | -0.5626 | -0.3477 |
| Q5W9C5     | 0.6055  | -0.2752 | 0.4679  | 0.3303  | 0.0747  | 0.7852  | 0.3582  |
| F1P201     | -0.6500 | 0.0500  | -0.4833 | -0.2667 | -0.3870 | -0.3733 | -0.4513 |
| A0A3Q2TZ57 | -0.0833 | -0.2833 | -0.1833 | 0.0000  | -0.1088 | 0.4601  | -0.4482 |
| P35062     | 0.6055  | -0.2752 | 0.4679  | 0.3303  | 0.0747  | 0.7852  | 0.3582  |
| F1NDH2     | 0.4184  | -0.6695 | 0.4184  | 0.3347  | -0.0802 | 0.7666  | 0.6469  |
| A0A1D5NTE7 | 0.0667  | -0.1667 | -0.1000 | -0.1000 | -0.3484 | 0.4898  | -0.1482 |
| A0A3Q2TSW8 | 0.2623  | 0.3235  | 0.7170  | 0.0787  | 0.3450  | -0.3669 | 0.1724  |
| Q90944     | -0.2678 | 0.3682  | 0.2678  | -0.2510 | 0.2930  | -0.4599 | 0.1081  |
| A0A3Q2TUE5 | 0.3347  | -0.5858 | -0.0669 | 0.5021  | 0.2595  | 0.4825  | -0.0708 |
| A0A3Q2U775 | -0.4370 | 0.2269  | -0.6051 | -0.3782 | -0.3320 | -0.2651 | -0.6135 |
| Q90631     | -0.0504 | 0.4706  | 0.3193  | 0.1513  | 0.3136  | -0.5030 | -0.4149 |
| F1NV09     | 0.4519  | -0.0669 | 0.4184  | 0.2343  | 0.0999  | 0.7005  | 0.2729  |
| F1P3P3     | -0.3096 | 0.3431  | 0.0586  | 0.0167  | 0.2660  | -0.6086 | 0.1293  |

---

|            |         |         |         |         |         |         |         |
|------------|---------|---------|---------|---------|---------|---------|---------|
| A0A3Q2UFJ3 | 0.3656  | -0.5570 | 0.1654  | 0.3133  | 0.0892  | 0.7930  | 0.3284  |
| P79795     | -0.5356 | -0.2762 | -0.4352 | -0.1255 | -0.3284 | 0.2574  | -0.1945 |
| P00565     | -0.3109 | 0.5462  | 0.0168  | -0.2857 | 0.1592  | -0.6919 | 0.0456  |
| A0A3Q2U0U0 | -0.4557 | 0.3798  | 0.0760  | -0.4811 | 0.0061  | -0.7820 | -0.2560 |
| F1NBT0     | 0.3500  | -0.4167 | -0.0500 | 0.4333  | 0.1040  | 0.3560  | 0.0726  |
| A0A3Q2TXN1 | 0.2000  | -0.1667 | -0.1500 | -0.0333 | -0.3372 | 0.4953  | -0.3305 |
| Q5ZLZ6     | -0.0667 | 0.4333  | 0.5333  | -0.1000 | 0.2741  | -0.2198 | 0.1905  |
| F1NSM7     | 0.0669  | -0.0167 | 0.6025  | 0.0000  | 0.2346  | -0.0113 | 0.6450  |
| F1NLW7     | 0.0550  | 0.2752  | 0.6055  | -0.1651 | 0.2868  | -0.4520 | 0.2068  |
| A0A3Q2U3X0 | -0.3667 | 0.0833  | 0.2333  | -0.3500 | 0.3824  | -0.4507 | 0.2095  |
| A0A1D5PLD7 | 0.3000  | 0.0833  | 0.4333  | 0.2167  | 0.2577  | -0.3549 | 0.1549  |
| F1NIW7     | 0.3798  | -0.3545 | 0.0000  | 0.1772  | 0.0560  | 0.7877  | 0.3356  |
| F1NVY4     | 0.0252  | 0.5799  | 0.3109  | -0.0336 | 0.3360  | -0.3941 | 0.1493  |
| F1NCZ2     | 0.3235  | -0.2885 | 0.8307  | 0.7345  | 0.1991  | 0.8105  | 0.4379  |
| R4GJX3     | 0.0335  | 0.5523  | 0.6025  | -0.2343 | 0.1876  | -0.3330 | 0.1459  |
| A0A1D5P9J0 | -0.5000 | -0.2167 | -0.7333 | -0.2833 | -0.5914 | -0.0962 | -0.2666 |
| A0A1D5PYR9 | -0.2092 | -0.1590 | -0.6444 | -0.3347 | -0.4738 | -0.0098 | -0.4399 |
| A0A1D5P6B0 | -0.2752 | 0.6055  | 0.3303  | -0.3853 | 0.2868  | -0.4520 | 0.2068  |
| P46157     | 0.3000  | 0.2833  | 0.6167  | 0.3833  | 0.3984  | -0.1936 | 0.2013  |
| Q90740     | 0.2043  | 0.0681  | 0.4937  | 0.2894  | 0.5908  | -0.0974 | 0.0713  |
| P00337     | 0.5188  | -0.0335 | 0.7866  | 0.2008  | -0.1173 | 0.5006  | 0.8998  |
| A0A0K0PUH6 | 0.1333  | 0.1500  | 0.7000  | 0.1500  | 0.3212  | -0.1511 | 0.2480  |
| A0A3Q2TZU8 | -0.6051 | 0.5883  | -0.0756 | -0.7395 | 0.1040  | -0.5871 | -0.2311 |
| Q5ZHM4     | 0.0667  | 0.2500  | 0.4167  | 0.3167  | 0.4428  | -0.1932 | 0.0767  |
| A0A1L1RYU0 | -0.0335 | 0.6025  | 0.2343  | -0.0167 | 0.4277  | -0.5383 | -0.0139 |
| E1C007     | 0.8167  | -0.1500 | 0.2667  | 0.6667  | 0.3031  | 0.5415  | 0.1345  |

---

|            |         |         |         |         |         |         |         |
|------------|---------|---------|---------|---------|---------|---------|---------|
| A0A2H4C5L1 | -0.2752 | 0.6055  | 0.3303  | -0.3853 | 0.2868  | -0.4520 | 0.2068  |
| Q5ZKY7     | -0.2343 | -0.4184 | -0.4854 | -0.3347 | -0.3661 | 0.2986  | -0.1489 |
| Q5F3U5     | 0.5421  | -0.3148 | 0.6645  | 0.4722  | -0.1247 | 0.5356  | 0.3327  |
| F1NSD3     | 0.4167  | -0.2833 | 0.1667  | 0.2667  | -0.2490 | 0.3979  | 0.6343  |
| R4GKL8     | -0.7333 | 0.2333  | -0.5500 | -0.6667 | -0.3759 | -0.6324 | -0.4215 |
| A0A3Q2U7Z1 | 0.4017  | -0.0502 | -0.2510 | 0.2008  | -0.2939 | 0.4589  | -0.0606 |
| F1NYI9     | 0.0335  | -0.1674 | 0.4017  | 0.1506  | 0.3155  | -0.0934 | 0.4765  |
| A0A3Q2U9L1 | 0.6390  | -0.2556 | 0.4930  | 0.3469  | -0.0783 | 0.8127  | 0.5423  |
| A0A3Q2TX84 | 0.3013  | -0.1841 | -0.2845 | 0.0669  | -0.3962 | 0.5858  | 0.4379  |
| F1NPN5     | -0.7029 | -0.0753 | -0.4854 | -0.4937 | -0.4125 | -0.1053 | -0.2642 |
| A0A1D5PPP9 | 0.5594  | -0.2373 | 0.6103  | 0.5594  | 0.2067  | 0.3120  | 0.0935  |
| Q5F3I1     | 0.7029  | -0.1339 | 0.7197  | 0.4184  | -0.0267 | 0.7930  | 0.5383  |
| A0A1L1RMF4 | 0.5690  | -0.3347 | 0.5523  | 0.5523  | 0.3317  | 0.6040  | 0.4132  |
| A0A3Q2UKP2 | -0.3833 | -0.0167 | -0.5667 | -0.2000 | -0.1494 | -0.0656 | -0.7517 |
| A0A3Q2UHT9 | 0.0000  | 0.2343  | 0.3682  | -0.1506 | 0.2851  | -0.4512 | 0.2120  |
| F1NUJ7     | 0.6387  | -0.3025 | 0.6219  | 0.7395  | 0.1361  | 0.7208  | 0.3460  |
| A0A1D5PKY9 | 0.0500  | -0.7500 | 0.1167  | 0.2000  | -0.3261 | 0.8223  | 0.4178  |
| A0A3Q2UHW3 | -0.3028 | -0.0275 | -0.6881 | -0.3853 | -0.3615 | -0.3332 | -0.5650 |
| A0A1L1RWM3 | -0.2678 | -0.0335 | -0.6695 | -0.2510 | -0.2515 | -0.0124 | -0.5613 |
| Q9WD0      | -0.6723 | 0.2437  | -0.6051 | -0.6639 | -0.1940 | -0.7275 | -0.4410 |
| Q9DER4     | -0.6583 | 0.4811  | -0.6330 | -0.6330 | -0.1810 | -0.7308 | -0.4730 |
| A0A1D5PIF2 | 0.1177  | 0.2605  | 0.6891  | 0.1092  | -0.0910 | -0.5461 | 0.1218  |
| A0A3Q2U504 | -0.4874 | 0.3866  | 0.0924  | -0.5210 | 0.2656  | -0.5005 | 0.1648  |
| A0A1D5PY04 | 0.2176  | -0.2510 | -0.1674 | 0.0837  | -0.0449 | 0.4341  | 0.0975  |
| Q2IAL7     | -0.5714 | -0.0084 | -0.5883 | -0.6807 | -0.5100 | -0.3891 | -0.0490 |
| F1NM67     | -0.0669 | 0.2176  | 0.1172  | 0.0000  | 0.3428  | -0.3891 | 0.3103  |

---

|            |         |         |         |         |         |         |         |
|------------|---------|---------|---------|---------|---------|---------|---------|
| A0A1D5PGT3 | 0.0550  | 0.2752  | 0.6055  | -0.1651 | 0.2868  | -0.4520 | 0.2068  |
| A0A3Q2UDP3 | 0.5771  | -0.5683 | 0.0525  | 0.4984  | 0.0205  | 0.6996  | 0.3428  |
| R4GIW4     | -0.2273 | 0.4022  | 0.0874  | -0.1924 | 0.2135  | -0.5981 | 0.1744  |
| Q90XB2     | 0.1101  | 0.4404  | 0.5505  | 0.0550  | 0.2868  | -0.4520 | 0.2068  |
| F1C6U4     | -0.1339 | 0.2176  | 0.3849  | -0.3347 | 0.1290  | -0.4662 | 0.3114  |
| A0A1D5P9U9 | -0.3950 | 0.4454  | 0.0336  | -0.3361 | 0.2170  | -0.4902 | 0.1234  |
| P21760     | 0.5188  | -0.3682 | -0.0502 | 0.4017  | -0.1177 | 0.7308  | -0.0303 |
| Q5ZLI2     | 0.5771  | -0.5683 | 0.0525  | 0.4984  | 0.0643  | 0.7756  | 0.3587  |
| Q2MJT5     | -0.1167 | -0.2833 | -0.3500 | 0.0000  | -0.1595 | 0.2516  | -0.0959 |
| Q5ZJX9     | -0.3849 | 0.3682  | 0.1255  | -0.2510 | 0.1953  | -0.6097 | 0.0988  |
| F1C6X7     | 0.3515  | -0.2343 | 0.2427  | 0.1172  | -0.2525 | 0.4814  | 0.1943  |
| R4GLT1     | 0.6639  | -0.3109 | 0.6387  | 0.5714  | 0.1635  | 0.7552  | 0.4623  |
| E1BWW2     | 0.2025  | 0.0760  | 0.7342  | 0.0760  | 0.3705  | -0.1046 | 0.4287  |
| E1BUA6     | -0.6606 | 0.1927  | -0.7707 | -0.6331 | -0.3615 | -0.3332 | -0.5650 |
| E1C0F3     | 0.5159  | -0.5946 | 0.0437  | 0.5509  | 0.0235  | 0.8021  | 0.3139  |
| A0A1D5NUZ0 | 0.2361  | 0.1924  | 0.7957  | 0.2361  | 0.3549  | -0.3486 | 0.1649  |
| Q91017     | -0.2437 | -0.0336 | -0.6303 | -0.3614 | -0.4050 | -0.2688 | -0.5079 |
| E1BW95     | -0.0251 | -0.0418 | 0.5439  | 0.1506  | 0.2997  | -0.1339 | 0.2461  |
| A0A1D5PPL7 | 0.1423  | 0.2762  | 0.5607  | -0.0167 | 0.3518  | -0.2147 | 0.3141  |
| Q27J90     | 0.2929  | -0.1841 | -0.0586 | 0.1088  | -0.4691 | 0.4694  | -0.1473 |
| A0A1L1RLL0 | -0.2798 | 0.5946  | 0.2448  | -0.2098 | 0.2847  | -0.4559 | 0.1992  |
| A0A3Q2UGF7 | 0.0167  | 0.0167  | 0.5021  | -0.0502 | 0.1439  | -0.1902 | 0.6926  |
| A0A3Q2UIJ5 | 0.4404  | -0.7156 | 0.2477  | 0.3853  | 0.0747  | 0.7852  | 0.3582  |
| Q5G8Y9     | -0.2773 | 0.5967  | 0.0588  | -0.3193 | 0.2693  | -0.5110 | 0.1307  |
| Q04584     | 0.1915  | 0.1654  | 0.8182  | 0.1480  | 0.2194  | -0.3069 | 0.3728  |
| F1NBW3     | -0.1000 | -0.3000 | -0.3833 | -0.2667 | -0.2651 | 0.4298  | 0.3621  |

---

|            |         |         |         |         |         |         |         |
|------------|---------|---------|---------|---------|---------|---------|---------|
| A0A3Q2UBB3 | -0.1306 | -0.0522 | -0.6441 | -0.1480 | -0.1959 | -0.0261 | -0.6555 |
| A0A1D5PXN3 | 0.4068  | 0.2373  | 0.7798  | 0.3051  | 0.1385  | -0.1382 | 0.1972  |
| A0A1D5P5T7 | -0.1849 | -0.1345 | -0.7143 | -0.2353 | -0.3196 | -0.3231 | -0.3940 |
| A0A3Q3APB3 | 0.6076  | -0.3798 | 0.6836  | 0.4304  | 0.0964  | 0.7799  | 0.3837  |
| F1P4U3     | 0.4435  | -0.4435 | -0.1004 | 0.3347  | -0.2222 | 0.6527  | 0.1071  |
| H9L0D7     | 0.2361  | 0.1924  | 0.7957  | 0.2361  | 0.4047  | -0.2254 | 0.1136  |
| A0A1L1RUW5 | 0.2176  | 0.2176  | 0.7866  | 0.0167  | 0.2529  | -0.3160 | 0.3688  |
| E1BSI4     | -0.2259 | 0.2259  | 0.3096  | -0.0167 | 0.2844  | -0.4696 | 0.1608  |
| A0A3Q3AJD3 | -0.7694 | 0.2798  | -0.5509 | -0.4896 | -0.3613 | -0.3332 | -0.5650 |
| A0A1D5PXM8 | 0.6862  | -0.3180 | 0.6695  | 0.5523  | 0.3729  | 0.5504  | 0.4231  |
| A0A3Q2UIT0 | 0.2092  | 0.1757  | 0.6778  | 0.3682  | 0.3384  | -0.2967 | 0.2517  |
| F1NL81     | -0.2373 | 0.2008  | -0.7303 | -0.1826 | -0.2967 | -0.3653 | -0.3605 |
| A0M8U0     | -0.4404 | -0.1927 | -0.6606 | -0.4679 | -0.3615 | -0.3332 | -0.5650 |
| F1NIM0     | -0.5799 | 0.1765  | -0.2017 | -0.4202 | -0.0729 | -0.4859 | -0.2246 |
| Q6PW00     | 0.6527  | -0.2343 | 0.5356  | 0.6025  | 0.3199  | 0.3422  | 0.5433  |
| Q5ZL65     | 0.3682  | 0.2343  | 0.7029  | 0.2510  | 0.2934  | -0.4311 | 0.2155  |
| F1NNF9     | 0.3038  | 0.1013  | 0.7849  | 0.3038  | 0.3074  | -0.3948 | 0.2519  |
| A0A3Q2TSK8 | -0.4129 | 0.0000  | -0.6331 | -0.5230 | -0.3615 | -0.3332 | -0.5650 |
| A0A1D5PT95 | 0.6093  | -0.5483 | 0.0783  | 0.5135  | -0.2059 | 0.6848  | 0.5796  |
| Q5ZL35     | 0.4286  | -0.1597 | 0.5462  | 0.3025  | 0.3056  | 0.1866  | 0.5050  |
| A0A1D5P7Y2 | -0.4129 | 0.0000  | -0.6331 | -0.5230 | -0.3615 | -0.3332 | -0.5650 |
| A0A1L1RZV0 | -0.3515 | 0.4017  | 0.3180  | -0.4352 | 0.2865  | -0.4525 | 0.2062  |
| Q8UWG7     | 0.1266  | 0.1519  | 0.7342  | 0.2279  | 0.3328  | -0.3084 | 0.3128  |
| P87362     | -0.5188 | 0.3682  | 0.1255  | -0.4854 | 0.2392  | -0.4714 | 0.1555  |
| Q9W6V5     | 0.1590  | 0.0753  | 0.5774  | 0.2845  | 0.2874  | -0.4156 | 0.2790  |
| A0A3Q2TXS3 | 0.3013  | -0.5105 | -0.1506 | 0.2092  | -0.2606 | 0.5422  | -0.0527 |

---

|            |         |         |         |         |         |         |         |
|------------|---------|---------|---------|---------|---------|---------|---------|
| E1C3Y3     | 0.5112  | -0.2739 | 0.3651  | 0.3469  | 0.1041  | 0.7423  | 0.3293  |
| E1C857     | 0.6444  | -0.3431 | 0.7113  | 0.6193  | 0.2043  | 0.7982  | 0.5139  |
| F1P386     | 0.3038  | 0.1013  | 0.7849  | 0.3038  | 0.3003  | -0.4157 | 0.2360  |
| Q90974     | -0.6219 | -0.0924 | -0.5378 | -0.1429 | -0.3617 | -0.1714 | -0.5327 |
| F1NLE7     | 0.6330  | -0.3038 | 0.6583  | 0.5317  | 0.2539  | 0.6424  | 0.5345  |
| Q9YHD2     | 0.1915  | -0.3482 | 0.1132  | -0.0348 | -0.2952 | 0.6193  | 0.1814  |
| Q5ZKS2     | -0.4874 | 0.1393  | -0.0348 | -0.3133 | -0.0670 | -0.5757 | 0.0330  |
| P23498     | -0.3000 | 0.3167  | -0.4833 | -0.4500 | 0.1724  | -0.4958 | -0.6012 |
| A0A1D5PMA3 | 0.8536  | -0.3682 | 0.3598  | 0.6862  | 0.0372  | 0.5656  | 0.3397  |
| F1NH19     | 0.3833  | 0.1167  | 0.7500  | 0.3333  | 0.1406  | -0.0749 | 0.3047  |
| Q9DF58     | -0.7731 | 0.2773  | -0.7395 | -0.5967 | -0.0170 | -0.8062 | -0.5674 |
| F1NPS5     | -0.3028 | 0.4679  | 0.4129  | -0.2202 | 0.2868  | -0.4520 | 0.2068  |
| F1N8W8     | -0.4404 | -0.1927 | -0.6606 | -0.4679 | -0.3615 | -0.3332 | -0.5650 |
| Q98SR1     | -0.0681 | -0.4852 | -0.3916 | -0.1958 | -0.5875 | 0.0799  | -0.0317 |
| A0A1D5PW36 | -0.4017 | 0.1095  | -0.6755 | -0.3286 | -0.3604 | -0.3219 | -0.6569 |
| Q9BD54     | 0.5210  | -0.3782 | 0.5883  | 0.4454  | 0.3428  | 0.4743  | 0.5346  |
| F1N851     | -0.7899 | 0.2269  | -0.7227 | -0.6639 | -0.2647 | -0.6425 | -0.5229 |
| E1C3X0     | 0.4454  | -0.0504 | 0.8320  | 0.5294  | 0.3724  | 0.3349  | 0.2108  |
| Q5ZJX7     | -0.3320 | -0.0681 | -0.7576 | -0.2298 | -0.3032 | -0.3100 | -0.5980 |
| E1C3D2     | 0.0550  | 0.2752  | 0.6055  | -0.1651 | 0.2868  | -0.4520 | 0.2068  |
| E1C1Q3     | 0.6055  | -0.2752 | 0.4679  | 0.3303  | 0.0747  | 0.7852  | 0.3582  |
| Q5F442     | 0.4404  | -0.7156 | 0.2477  | 0.3853  | 0.0747  | 0.7852  | 0.3582  |
| Q7T190     | 0.1339  | -0.5188 | -0.3013 | 0.1339  | -0.1429 | 0.5538  | 0.1047  |
| O42351     | 0.2437  | 0.1765  | 0.8236  | 0.2017  | 0.3501  | 0.3045  | 0.4878  |
| A0A1D5PMN6 | 0.2773  | 0.4118  | 0.6135  | 0.0504  | 0.1040  | -0.1927 | 0.2837  |
| Q7T2X3     | -0.3286 | 0.4930  | 0.4199  | -0.2373 | 0.2929  | -0.3348 | 0.2156  |

|            |         |         |        |         |         |         |        |
|------------|---------|---------|--------|---------|---------|---------|--------|
| A0A1D5PGI9 | -0.4352 | -0.0669 | 0.0502 | -0.4519 | -0.0683 | -0.3309 | 0.1971 |
| A0A3Q2TUM9 | 0.6330  | -0.2025 | 0.7089 | 0.3798  | 0.2536  | 0.6429  | 0.5343 |
| A0A1D5PNT8 | 0.3109  | -0.0084 | 0.6891 | 0.1681  | 0.3222  | -0.3409 | 0.2912 |

**Table S4 *P* value for the correlation analysis between DEPs and plasmal parameters**

|            | IL-1 $\beta$ | IL-10  | IL-6   | TNF- $\alpha$ | IgM    | IgG    | IgA    |
|------------|--------------|--------|--------|---------------|--------|--------|--------|
| A0A1D5NZY0 | 0.8641       | 0.0974 | 0.2032 | 0.6669        | 0.0346 | 0.6542 | 0.0674 |
| F1NK40     | 0.0992       | 0.9322 | 0.3085 | 0.0424        | 0.0458 | 0.4588 | 0.6382 |
| P01875     | 0.2242       | 0.3085 | 0.0096 | 0.0246        | 0.1621 | 0.0459 | 0.6030 |
| A0A1D5PCD2 | 0.3807       | 0.6368 | 0.1392 | 0.5165        | 0.1667 | 0.6597 | 0.1030 |
| A0A1D5PH32 | 0.9322       | 0.5457 | 0.2054 | 0.8647        | 0.3129 | 0.6961 | 0.7717 |
| Q90933     | 0.3085       | 0.7650 | 0.2242 | 0.6059        | 0.1988 | 0.5393 | 0.3437 |
| E1BTI7     | 0.8984       | 0.7001 | 0.4328 | 0.7980        | 0.9980 | 0.3560 | 0.3153 |
| P68139     | 0.2355       | 0.0302 | 0.5205 | 0.3058        | 0.8486 | 0.0122 | 0.3439 |
| Q7SX63     | 0.8641       | 0.9659 | 0.0753 | 0.9319        | 0.7876 | 0.9741 | 0.0768 |
| Q6Q1Q8     | 0.0099       | 0.3444 | 0.3058 | 0.1246        | 0.8486 | 0.0122 | 0.3439 |
| A0A3Q2TZA4 | 0.4600       | 0.5457 | 0.1250 | 0.5755        | 0.3336 | 0.5723 | 0.0628 |
| P09244     | 1.0000       | 0.1231 | 0.9659 | 0.5440        | 0.7216 | 0.0957 | 0.5158 |
| A0A3Q3ANZ2 | 0.3807       | 0.9322 | 0.0581 | 0.4328        | 0.0320 | 0.8253 | 0.3584 |
| F1NW23     | 0.9661       | 0.5165 | 0.3317 | 0.8647        | 0.0919 | 0.7359 | 0.9150 |
| O93410     | 0.2242       | 0.4879 | 0.0096 | 0.0072        | 0.3546 | 0.2262 | 0.3138 |
| F1NQD9     | 0.4022       | 0.6656 | 0.0367 | 0.6656        | 0.3454 | 0.5293 | 0.0819 |
| E1C7C1     | 0.3807       | 0.2646 | 0.0424 | 0.0298        | 0.2372 | 0.1737 | 0.3048 |

---

|            |        |        |        |        |        |        |        |
|------------|--------|--------|--------|--------|--------|--------|--------|
| A0A1D5PGD5 | 0.3317 | 0.4064 | 0.7324 | 0.5165 | 0.2263 | 0.1860 | 0.2211 |
| A5HUM6     | 0.6044 | 0.8979 | 0.0412 | 0.7971 | 0.3608 | 0.9375 | 0.1651 |
| A0A3Q2U7A2 | 0.6682 | 0.8984 | 0.0053 | 0.5165 | 0.3249 | 0.7075 | 0.2982 |
| P01994     | 0.9661 | 0.5755 | 0.2054 | 0.5457 | 0.1933 | 0.6855 | 0.3269 |
| A0A3Q2U0N4 | 0.4064 | 0.8647 | 0.0769 | 0.5755 | 0.8753 | 0.6187 | 0.4422 |
| A0A3Q2UGD4 | 0.4879 | 0.5457 | 0.0199 | 0.2440 | 0.1336 | 0.2172 | 0.2184 |
| A0A3Q2UFG5 | 0.4328 | 0.7001 | 0.3317 | 0.7650 | 0.4686 | 0.6186 | 0.0788 |
| A0A3Q2U3V9 | 0.0053 | 0.8647 | 0.8984 | 0.2054 | 0.6186 | 0.3164 | 0.9408 |
| P26007     | 0.7980 | 0.8984 | 0.9322 | 0.7650 | 0.1910 | 0.3173 | 0.5021 |
| A0A1D5NXR0 | 0.2646 | 0.6059 | 0.2646 | 0.2646 | 0.7637 | 0.0940 | 0.9923 |
| A0A1D5P4G6 | 0.8647 | 0.7001 | 0.3807 | 0.8984 | 0.3240 | 0.1789 | 0.4367 |
| A0A1D5P7D0 | 0.8984 | 0.7980 | 0.2242 | 0.7650 | 0.1231 | 0.9872 | 0.9706 |
| R4GM71     | 0.6989 | 0.8641 | 0.0753 | 0.7313 | 0.3867 | 0.4914 | 0.2629 |
| A0A173G7D2 | 0.1281 | 0.6656 | 0.1145 | 0.0252 | 0.1668 | 0.4510 | 0.4400 |
| E1BY44     | 1.0000 | 1.0000 | 0.0567 | 0.7640 | 0.5384 | 0.5124 | 0.2542 |
| Q70YQ8     | 0.3085 | 0.7650 | 0.0199 | 0.3807 | 0.8222 | 0.8731 | 0.6162 |
| F1P2W2     | 0.3063 | 0.3063 | 0.8305 | 0.2624 | 0.9811 | 0.0708 | 0.9514 |
| F1NWN4     | 0.0347 | 0.5147 | 0.0974 | 0.0347 | 0.4432 | 0.7102 | 0.2225 |
| P07630     | 0.0191 | 0.9659 | 0.0068 | 0.3063 | 0.8702 | 0.0555 | 0.0376 |
| Q90593     | 0.1373 | 0.4308 | 0.7971 | 0.3063 | 0.6676 | 0.0730 | 0.8626 |
| A0A3Q2U871 | 0.1705 | 0.5457 | 0.4879 | 0.0358 | 0.9605 | 0.3755 | 0.9423 |
| F1P291     | 0.3807 | 0.2054 | 0.1116 | 0.1705 | 0.0974 | 0.2142 | 0.0542 |
| Q6IEC5     | 0.4328 | 0.9322 | 0.5165 | 0.3807 | 0.2789 | 0.5556 | 0.5652 |
| A0A3Q2U540 | 0.0769 | 0.3317 | 0.4879 | 0.2646 | 0.6642 | 0.1152 | 0.5691 |
| B5BSS3     | 0.8519 | 0.2605 | 0.0985 | 0.8153 | 0.4905 | 0.2071 | 0.6050 |
| F1NEB3     | 0.3085 | 0.1392 | 0.9661 | 0.4064 | 0.5050 | 0.0179 | 0.3051 |

---

|            |        |        |        |        |        |        |        |
|------------|--------|--------|--------|--------|--------|--------|--------|
| A0A3Q2U4V6 | 0.3639 | 0.3274 | 0.9487 | 0.6816 | 0.3324 | 0.0619 | 0.6626 |
| F1NWP1     | 0.2646 | 0.3807 | 0.7001 | 0.5755 | 0.6180 | 0.1014 | 0.9960 |
| A0A3Q2U324 | 0.2440 | 0.9661 | 0.1875 | 0.1250 | 0.0695 | 0.6392 | 0.2918 |
| A0A2R3TVM2 | 0.9322 | 0.4600 | 0.0072 | 0.8312 | 0.8972 | 0.6983 | 0.0637 |
| Q5ZMT0     | 0.5755 | 0.9661 | 0.7001 | 0.9322 | 0.4950 | 0.3218 | 0.4198 |
| E1C7T9     | 0.0237 | 0.8305 | 0.0860 | 0.0860 | 0.4310 | 0.0782 | 0.8218 |
| F1NSA8     | 0.6656 | 0.5571 | 0.2817 | 0.3156 | 0.8241 | 0.4514 | 0.1805 |
| E1BZN8     | 0.1684 | 0.2220 | 0.6989 | 0.2839 | 0.5223 | 0.1148 | 0.3591 |
| Q5W9C5     | 0.0840 | 0.4735 | 0.2040 | 0.3853 | 0.8486 | 0.0122 | 0.3439 |
| F1P201     | 0.0581 | 0.8984 | 0.1875 | 0.4879 | 0.3035 | 0.3223 | 0.2227 |
| A0A3Q2TZ57 | 0.8312 | 0.4600 | 0.6368 | 1.0000 | 0.7806 | 0.2126 | 0.2263 |
| P35062     | 0.0840 | 0.4735 | 0.2040 | 0.3853 | 0.8486 | 0.0122 | 0.3439 |
| F1NDH2     | 0.2624 | 0.0486 | 0.2624 | 0.3786 | 0.8375 | 0.0160 | 0.0597 |
| A0A1D5NTE7 | 0.8647 | 0.6682 | 0.7980 | 0.7980 | 0.3582 | 0.1807 | 0.7036 |
| A0A3Q2TSW8 | 0.4953 | 0.3957 | 0.0297 | 0.8405 | 0.3632 | 0.3314 | 0.6574 |
| Q90944     | 0.4860 | 0.3296 | 0.4860 | 0.5147 | 0.4442 | 0.2129 | 0.7820 |
| A0A3Q2TUE5 | 0.3786 | 0.0974 | 0.8641 | 0.1684 | 0.5002 | 0.1883 | 0.8563 |
| A0A3Q2U775 | 0.2395 | 0.5571 | 0.0843 | 0.3156 | 0.3828 | 0.4906 | 0.0789 |
| Q90631     | 0.8975 | 0.2011 | 0.4022 | 0.6977 | 0.4111 | 0.1675 | 0.2668 |
| F1NV09     | 0.2220 | 0.8641 | 0.2624 | 0.5440 | 0.7981 | 0.0356 | 0.4775 |
| F1P3P3     | 0.4175 | 0.3660 | 0.8810 | 0.9659 | 0.4890 | 0.0820 | 0.7403 |
| A0A3Q2UFJ3 | 0.3333 | 0.1192 | 0.6707 | 0.4116 | 0.8196 | 0.0108 | 0.3883 |
| P79795     | 0.1373 | 0.4720 | 0.2418 | 0.7476 | 0.3882 | 0.5037 | 0.6161 |
| P00565     | 0.4154 | 0.1281 | 0.9658 | 0.4561 | 0.6824 | 0.0389 | 0.9074 |
| A0A3Q2U0U0 | 0.2176 | 0.3134 | 0.8460 | 0.1899 | 0.9876 | 0.0128 | 0.5062 |
| F1NBT0     | 0.3558 | 0.2646 | 0.8984 | 0.2440 | 0.7900 | 0.3470 | 0.8528 |

---

|            |        |        |        |        |        |        |        |
|------------|--------|--------|--------|--------|--------|--------|--------|
| A0A3Q2TXN1 | 0.6059 | 0.6682 | 0.7001 | 0.9322 | 0.3748 | 0.1751 | 0.3850 |
| Q5ZLZ6     | 0.8647 | 0.2440 | 0.1392 | 0.7980 | 0.4754 | 0.5698 | 0.6235 |
| F1NSM7     | 0.8641 | 0.9659 | 0.0860 | 1.0000 | 0.5434 | 0.9770 | 0.0607 |
| F1NLW7     | 0.8881 | 0.4735 | 0.0840 | 0.6711 | 0.4543 | 0.2219 | 0.5934 |
| A0A3Q2U3X0 | 0.3317 | 0.8312 | 0.5457 | 0.3558 | 0.3098 | 0.2235 | 0.5885 |
| A0A1D5PLD7 | 0.4328 | 0.8312 | 0.2440 | 0.5755 | 0.5032 | 0.3487 | 0.6907 |
| F1NIW7     | 0.3134 | 0.3493 | 1.0000 | 0.6483 | 0.8863 | 0.0117 | 0.3773 |
| F1NVY4     | 0.9487 | 0.1017 | 0.4154 | 0.9316 | 0.3766 | 0.2940 | 0.7015 |
| F1NCZ2     | 0.3957 | 0.4515 | 0.0056 | 0.0242 | 0.6076 | 0.0081 | 0.2384 |
| R4GJX3     | 0.9319 | 0.1231 | 0.0860 | 0.5440 | 0.6288 | 0.3812 | 0.7079 |
| A0A1D5P9J0 | 0.1705 | 0.5755 | 0.0246 | 0.4600 | 0.0935 | 0.8056 | 0.4881 |
| A0A1D5PYR9 | 0.5890 | 0.6828 | 0.0610 | 0.3786 | 0.1976 | 0.9800 | 0.2361 |
| A0A1D5P6B0 | 0.4735 | 0.0840 | 0.3853 | 0.3058 | 0.4543 | 0.2219 | 0.5934 |
| P46157     | 0.4328 | 0.4600 | 0.0769 | 0.3085 | 0.2882 | 0.6178 | 0.6035 |
| Q90740     | 0.5980 | 0.8618 | 0.1768 | 0.4500 | 0.0939 | 0.8032 | 0.8554 |
| P00337     | 0.1524 | 0.9319 | 0.0119 | 0.6044 | 0.7637 | 0.1699 | 0.0009 |
| A0A0K0PUH6 | 0.7324 | 0.7001 | 0.0358 | 0.7001 | 0.3993 | 0.6980 | 0.5200 |
| A0A3Q2TZU8 | 0.0843 | 0.0957 | 0.8467 | 0.0228 | 0.7900 | 0.0965 | 0.5497 |
| Q5ZHM4     | 0.8647 | 0.5165 | 0.2646 | 0.4064 | 0.2326 | 0.6185 | 0.8444 |
| A0A1L1RYU0 | 0.9319 | 0.0860 | 0.5440 | 0.9659 | 0.2509 | 0.1349 | 0.9717 |
| E1C007     | 0.0072 | 0.7001 | 0.4879 | 0.0499 | 0.4279 | 0.1321 | 0.7302 |
| A0A2H4C5L1 | 0.4735 | 0.0840 | 0.3853 | 0.3058 | 0.4543 | 0.2219 | 0.5934 |
| Q5ZKY7     | 0.5440 | 0.2624 | 0.1854 | 0.3786 | 0.3326 | 0.4351 | 0.7022 |
| Q5F3U5     | 0.1316 | 0.4094 | 0.0509 | 0.1994 | 0.7493 | 0.1372 | 0.3817 |
| F1NSD3     | 0.2646 | 0.4600 | 0.6682 | 0.4879 | 0.5181 | 0.2889 | 0.0666 |
| R4GKL8     | 0.0246 | 0.5457 | 0.1250 | 0.0499 | 0.3187 | 0.0676 | 0.2585 |

---

|            |        |        |        |        |        |        |        |
|------------|--------|--------|--------|--------|--------|--------|--------|
| A0A3Q2U7Z1 | 0.2839 | 0.8979 | 0.5147 | 0.6044 | 0.4427 | 0.2140 | 0.8769 |
| F1NYI9     | 0.9319 | 0.6669 | 0.2839 | 0.6989 | 0.4083 | 0.8112 | 0.1947 |
| A0A3Q2U9L1 | 0.0639 | 0.5068 | 0.1775 | 0.3604 | 0.8413 | 0.0078 | 0.1314 |
| A0A3Q2TX84 | 0.4308 | 0.6354 | 0.4581 | 0.8641 | 0.2911 | 0.0974 | 0.2385 |
| F1NPN5     | 0.0347 | 0.8473 | 0.1854 | 0.1768 | 0.2699 | 0.7875 | 0.4922 |
| A0A1D5PPP9 | 0.1173 | 0.5387 | 0.0809 | 0.1173 | 0.5936 | 0.4138 | 0.8109 |
| Q5F3I1     | 0.0347 | 0.7313 | 0.0288 | 0.2624 | 0.9457 | 0.0108 | 0.1349 |
| A0A1L1RMF4 | 0.1098 | 0.3786 | 0.1231 | 0.1231 | 0.3832 | 0.0850 | 0.2689 |
| A0A3Q2UKP2 | 0.3085 | 0.9661 | 0.1116 | 0.6059 | 0.7013 | 0.8669 | 0.0195 |
| A0A3Q2UHT9 | 1.0000 | 0.5440 | 0.3296 | 0.6989 | 0.4572 | 0.2228 | 0.5840 |
| F1NUJ7     | 0.0641 | 0.4288 | 0.0738 | 0.0228 | 0.7269 | 0.0285 | 0.3618 |
| A0A1D5PKY9 | 0.8984 | 0.0199 | 0.7650 | 0.6059 | 0.3917 | 0.0065 | 0.2632 |
| A0A3Q2UHW3 | 0.4284 | 0.9440 | 0.0405 | 0.3058 | 0.3392 | 0.3809 | 0.1129 |
| A0A1L1RWM3 | 0.4860 | 0.9319 | 0.0486 | 0.5147 | 0.5139 | 0.9748 | 0.1158 |
| Q90WD0     | 0.0473 | 0.5274 | 0.0843 | 0.0512 | 0.6170 | 0.0263 | 0.2347 |
| Q9DER4     | 0.0539 | 0.1899 | 0.0673 | 0.0673 | 0.6413 | 0.0253 | 0.1985 |
| A0A1D5PIF2 | 0.7631 | 0.4984 | 0.0400 | 0.7796 | 0.8159 | 0.1283 | 0.7549 |
| A0A3Q2U504 | 0.1832 | 0.3041 | 0.8130 | 0.1503 | 0.4897 | 0.1700 | 0.6719 |
| A0A1D5PY04 | 0.5739 | 0.5147 | 0.6669 | 0.8305 | 0.9087 | 0.2431 | 0.8029 |
| Q2IAL7     | 0.1080 | 0.9829 | 0.0957 | 0.0436 | 0.1607 | 0.3007 | 0.9005 |
| F1NM67     | 0.8641 | 0.5739 | 0.7640 | 1.0000 | 0.3665 | 0.3007 | 0.4164 |
| A0A1D5PGT3 | 0.8881 | 0.4735 | 0.0840 | 0.6711 | 0.4543 | 0.2219 | 0.5934 |
| A0A3Q2UDP3 | 0.1037 | 0.1103 | 0.8934 | 0.1721 | 0.9582 | 0.0359 | 0.3665 |
| R4GIW4     | 0.5564 | 0.2832 | 0.8230 | 0.6200 | 0.5812 | 0.0889 | 0.6537 |
| Q90XB2     | 0.7780 | 0.2355 | 0.1246 | 0.8881 | 0.4543 | 0.2219 | 0.5934 |
| F1C6U4     | 0.7313 | 0.5739 | 0.3063 | 0.3786 | 0.7408 | 0.2059 | 0.4146 |

---

|            |        |        |        |        |        |        |        |
|------------|--------|--------|--------|--------|--------|--------|--------|
| A0A1D5P9U9 | 0.2928 | 0.2296 | 0.9316 | 0.3765 | 0.5749 | 0.1804 | 0.7519 |
| P21760     | 0.1524 | 0.3296 | 0.8979 | 0.2839 | 0.7629 | 0.0253 | 0.9384 |
| Q5ZLI2     | 0.1037 | 0.1103 | 0.8934 | 0.1721 | 0.8694 | 0.0140 | 0.3432 |
| Q2MJT5     | 0.7650 | 0.4600 | 0.3558 | 1.0000 | 0.6818 | 0.5137 | 0.8061 |
| Q5ZJX9     | 0.3063 | 0.3296 | 0.7476 | 0.5147 | 0.6146 | 0.0813 | 0.8003 |
| F1C6X7     | 0.3537 | 0.5440 | 0.5292 | 0.7640 | 0.5122 | 0.1895 | 0.6164 |
| R4GLT1     | 0.0512 | 0.4154 | 0.0641 | 0.1080 | 0.6743 | 0.0186 | 0.2103 |
| E1BWW2     | 0.6012 | 0.8460 | 0.0243 | 0.8460 | 0.3264 | 0.7889 | 0.2496 |
| E1BUA6     | 0.0528 | 0.6194 | 0.0151 | 0.0672 | 0.3392 | 0.3809 | 0.1129 |
| E1C0F3     | 0.1551 | 0.0913 | 0.9111 | 0.1243 | 0.9522 | 0.0093 | 0.4108 |
| A0A1D5NUZ0 | 0.5408 | 0.6200 | 0.0103 | 0.5408 | 0.3487 | 0.3578 | 0.6717 |
| Q91017     | 0.5274 | 0.9316 | 0.0688 | 0.3393 | 0.2795 | 0.4843 | 0.1627 |
| E1BW95     | 0.9489 | 0.9149 | 0.1301 | 0.6989 | 0.4334 | 0.7313 | 0.5232 |
| A0A1D5PPL7 | 0.7150 | 0.4720 | 0.1163 | 0.9659 | 0.3531 | 0.5790 | 0.4105 |
| Q27J90     | 0.4444 | 0.6354 | 0.8810 | 0.7806 | 0.2027 | 0.2024 | 0.7053 |
| A0A1L1RLL0 | 0.4659 | 0.0913 | 0.5255 | 0.5879 | 0.4578 | 0.2174 | 0.6073 |
| A0A3Q2UGF7 | 0.9659 | 0.9659 | 0.1684 | 0.8979 | 0.7118 | 0.6240 | 0.0387 |
| A0A3Q2UIJ5 | 0.2355 | 0.0302 | 0.5205 | 0.3058 | 0.8486 | 0.0122 | 0.3439 |
| Q5G8Y9     | 0.4700 | 0.0899 | 0.8805 | 0.4022 | 0.4834 | 0.1597 | 0.7375 |
| Q04584     | 0.6216 | 0.6707 | 0.0070 | 0.7040 | 0.5706 | 0.4218 | 0.3231 |
| F1NBW3     | 0.7980 | 0.4328 | 0.3085 | 0.4879 | 0.4907 | 0.2483 | 0.3382 |
| A0A3Q2UBB3 | 0.7378 | 0.8939 | 0.0612 | 0.7040 | 0.6134 | 0.9468 | 0.0553 |
| A0A1D5PXN3 | 0.2772 | 0.5387 | 0.0132 | 0.4246 | 0.7224 | 0.7228 | 0.6111 |
| A0A1D5P5T7 | 0.6339 | 0.7302 | 0.0306 | 0.5422 | 0.4018 | 0.3964 | 0.2940 |
| A0A3Q3APB3 | 0.0826 | 0.3134 | 0.0423 | 0.2475 | 0.8051 | 0.0132 | 0.3081 |
| F1P4U3     | 0.2318 | 0.2318 | 0.7971 | 0.3786 | 0.5656 | 0.0567 | 0.7838 |

---

|            |        |        |        |        |        |        |        |
|------------|--------|--------|--------|--------|--------|--------|--------|
| H9L0D7     | 0.5408 | 0.6200 | 0.0103 | 0.5408 | 0.2799 | 0.5598 | 0.7711 |
| A0A1L1RUW5 | 0.5739 | 0.5739 | 0.0119 | 0.9659 | 0.5116 | 0.4075 | 0.3287 |
| E1BSI4     | 0.5588 | 0.5588 | 0.4175 | 0.9659 | 0.4583 | 0.2022 | 0.6793 |
| A0A3Q3AJD3 | 0.0153 | 0.4659 | 0.1243 | 0.1809 | 0.3393 | 0.3809 | 0.1129 |
| A0A1D5PXM8 | 0.0412 | 0.4043 | 0.0486 | 0.1231 | 0.3229 | 0.1247 | 0.2565 |
| A0A3Q2UIT0 | 0.5890 | 0.6511 | 0.0448 | 0.3296 | 0.3731 | 0.4382 | 0.5136 |
| F1NL81     | 0.5386 | 0.6044 | 0.0255 | 0.6382 | 0.4381 | 0.3337 | 0.3405 |
| A0M8U0     | 0.2355 | 0.6194 | 0.0528 | 0.2040 | 0.3392 | 0.3809 | 0.1129 |
| F1NIM0     | 0.1017 | 0.6497 | 0.6028 | 0.2602 | 0.8521 | 0.1847 | 0.5612 |
| Q6PW00     | 0.0567 | 0.5440 | 0.1373 | 0.0860 | 0.4014 | 0.3674 | 0.1306 |
| Q5ZL65     | 0.3296 | 0.5440 | 0.0347 | 0.5147 | 0.4436 | 0.2467 | 0.5776 |
| F1NNF9     | 0.4267 | 0.7954 | 0.0122 | 0.4267 | 0.4210 | 0.2930 | 0.5131 |
| A0A3Q2TSK8 | 0.2694 | 1.0000 | 0.0672 | 0.1486 | 0.3392 | 0.3809 | 0.1129 |
| A0A1D5PT95 | 0.0816 | 0.1264 | 0.8412 | 0.1573 | 0.5951 | 0.0418 | 0.1019 |
| Q5ZL35     | 0.2497 | 0.6816 | 0.1281 | 0.4288 | 0.4240 | 0.6306 | 0.1655 |
| A0A1D5P7Y2 | 0.2694 | 1.0000 | 0.0672 | 0.1486 | 0.3392 | 0.3809 | 0.1129 |
| A0A1L1RZV0 | 0.3537 | 0.2839 | 0.4043 | 0.2418 | 0.4549 | 0.2213 | 0.5946 |
| Q8UWG7     | 0.7455 | 0.6964 | 0.0243 | 0.5554 | 0.3816 | 0.4194 | 0.4125 |
| P87362     | 0.1524 | 0.3296 | 0.7476 | 0.1854 | 0.5353 | 0.2002 | 0.6895 |
| Q9W6V5     | 0.6828 | 0.8473 | 0.1035 | 0.4581 | 0.4533 | 0.2660 | 0.4672 |
| A0A3Q2TXS3 | 0.4308 | 0.1603 | 0.6989 | 0.5890 | 0.4983 | 0.1315 | 0.8929 |
| E1C3Y3     | 0.1596 | 0.4758 | 0.3339 | 0.3604 | 0.7899 | 0.0220 | 0.3868 |
| E1C857     | 0.0610 | 0.3660 | 0.0317 | 0.0753 | 0.5980 | 0.0099 | 0.1570 |
| F1P386     | 0.4267 | 0.7954 | 0.0122 | 0.4267 | 0.4324 | 0.2659 | 0.5411 |
| Q90974     | 0.0738 | 0.8130 | 0.1353 | 0.7139 | 0.3388 | 0.6593 | 0.1398 |
| F1NLE7     | 0.0673 | 0.4267 | 0.0539 | 0.1407 | 0.5097 | 0.0621 | 0.1382 |

---

|            |        |        |        |        |        |        |        |
|------------|--------|--------|--------|--------|--------|--------|--------|
| Q9YHD2     | 0.6216 | 0.3585 | 0.7719 | 0.9291 | 0.4406 | 0.0753 | 0.6405 |
| Q5ZKS2     | 0.1832 | 0.7208 | 0.9291 | 0.4116 | 0.8641 | 0.1048 | 0.9329 |
| P23498     | 0.4328 | 0.4064 | 0.1875 | 0.2242 | 0.6574 | 0.1747 | 0.0869 |
| A0A1D5PMA3 | 0.0034 | 0.3296 | 0.3415 | 0.0412 | 0.9242 | 0.1124 | 0.3711 |
| F1NH19     | 0.3085 | 0.7650 | 0.0199 | 0.3807 | 0.7183 | 0.8482 | 0.4252 |
| Q9DF58     | 0.0145 | 0.4700 | 0.0228 | 0.0899 | 0.9654 | 0.0087 | 0.1110 |
| F1NPS5     | 0.4284 | 0.2040 | 0.2694 | 0.5692 | 0.4543 | 0.2219 | 0.5934 |
| F1N8W8     | 0.2355 | 0.6194 | 0.0528 | 0.2040 | 0.3392 | 0.3809 | 0.1129 |
| Q98SR1     | 0.8618 | 0.1855 | 0.2973 | 0.6137 | 0.0962 | 0.8381 | 0.9355 |
| A0A1D5PW36 | 0.2839 | 0.7791 | 0.0458 | 0.3879 | 0.3407 | 0.3983 | 0.0546 |
| Q9BD54     | 0.1503 | 0.3156 | 0.0957 | 0.2296 | 0.3665 | 0.1971 | 0.1381 |
| F1N851     | 0.0113 | 0.5571 | 0.0278 | 0.0512 | 0.4913 | 0.0620 | 0.1486 |
| E1C3X0     | 0.2296 | 0.8975 | 0.0054 | 0.1427 | 0.3237 | 0.3783 | 0.5861 |
| Q5ZJX7     | 0.3828 | 0.8618 | 0.0180 | 0.5519 | 0.4278 | 0.4169 | 0.0890 |
| E1C3D2     | 0.8881 | 0.4735 | 0.0840 | 0.6711 | 0.4543 | 0.2219 | 0.5934 |
| E1C1Q3     | 0.0840 | 0.4735 | 0.2040 | 0.3853 | 0.8486 | 0.0122 | 0.3439 |
| Q5F442     | 0.2355 | 0.0302 | 0.5205 | 0.3058 | 0.8486 | 0.0122 | 0.3439 |
| Q7T190     | 0.7313 | 0.1524 | 0.4308 | 0.7313 | 0.7138 | 0.1218 | 0.7886 |
| O42351     | 0.5274 | 0.6497 | 0.0064 | 0.6028 | 0.3556 | 0.4256 | 0.1828 |
| A0A1D5PMN6 | 0.4700 | 0.2708 | 0.0789 | 0.8975 | 0.7899 | 0.6194 | 0.4594 |
| Q7T2X3     | 0.3879 | 0.1775 | 0.2605 | 0.5386 | 0.4443 | 0.3785 | 0.5774 |
| A0A1D5PGI9 | 0.2418 | 0.8641 | 0.8979 | 0.2220 | 0.8614 | 0.3845 | 0.6112 |
| A0A3Q2TUM9 | 0.0673 | 0.6012 | 0.0325 | 0.3134 | 0.5103 | 0.0618 | 0.1384 |
| A0A1D5PNT8 | 0.4154 | 0.9829 | 0.0400 | 0.6656 | 0.3978 | 0.3694 | 0.4471 |

---

**Table S5 Correlation coefficient (r) for the correlation analysis between DEPs and jejunal parameters**

|            | IL-1 $\beta$ | IL-10   | IL-6    | TNF- $\alpha$ | IgM     | IgG     | IgA     |
|------------|--------------|---------|---------|---------------|---------|---------|---------|
| A0A1D5NZY0 | 0.6234       | 0.2373  | -0.2351 | 0.3426        | -0.2457 | 0.0421  | 0.0349  |
| F1NK40     | 0.5289       | -0.0342 | -0.4523 | -0.0445       | 0.1977  | 0.2190  | 0.7435  |
| P01875     | 0.4275       | 0.2597  | 0.6595  | 0.1002        | -0.3997 | 0.1125  | 0.1975  |
| A0A1D5PCD2 | -0.8075      | -0.5915 | -0.2252 | 0.4307        | 0.5749  | -0.2195 | -0.2368 |
| A0A1D5PH32 | 0.0199       | -0.6024 | 0.4003  | 0.6422        | -0.2792 | 0.2222  | -0.3840 |
| Q90933     | -0.6467      | -0.2635 | -0.1217 | 0.3696        | 0.2135  | 0.3377  | 0.1825  |
| E1BTI7     | 0.1994       | 0.9070  | -0.1410 | -0.1188       | 0.1034  | 0.5040  | 0.7831  |
| P68139     | 0.5197       | -0.3916 | 0.6571  | 0.3201        | -0.7591 | 0.1162  | -0.3484 |
| Q7SX63     | 0.2633       | 0.7578  | -0.1558 | -0.5591       | -0.0366 | -0.0648 | 0.4334  |
| Q6Q1Q8     | 0.5197       | -0.3916 | 0.6571  | 0.3201        | -0.7591 | 0.1162  | -0.3484 |
| A0A3Q2TZA4 | -0.7511      | -0.5470 | -0.3423 | 0.1889        | 0.7339  | -0.5430 | -0.3992 |
| P09244     | -0.0489      | 0.5931  | -0.7236 | -0.3619       | 0.4002  | 0.1214  | 0.4639  |
| A0A3Q3ANZ2 | -0.6642      | -0.6188 | -0.0921 | 0.2945        | 0.1363  | 0.0185  | -0.2752 |
| F1NW23     | 0.0558       | -0.6540 | 0.2450  | 0.4988        | -0.3654 | 0.2036  | -0.4923 |
| O93410     | 0.5956       | 0.5942  | 0.6479  | 0.1868        | -0.4142 | 0.4543  | 0.4670  |
| F1NQD9     | 0.8863       | 0.5424  | 0.2984  | -0.2720       | -0.6274 | 0.3281  | 0.1906  |
| E1C7C1     | 0.7125       | 0.3797  | 0.7487  | 0.1644        | -0.6245 | 0.3922  | 0.2433  |
| A0A1D5PGD5 | 0.2893       | -0.5640 | 0.2225  | 0.4558        | -0.5844 | 0.2263  | -0.3760 |
| A5HUM6     | 0.5618       | 0.7154  | 0.1011  | -0.5409       | -0.2248 | 0.0646  | 0.3696  |
| A0A3Q2U7A2 | 0.3783       | 0.6916  | 0.2699  | -0.5034       | -0.2155 | -0.0633 | 0.3240  |

---

|            |         |         |         |         |         |         |         |
|------------|---------|---------|---------|---------|---------|---------|---------|
| P01994     | 0.4070  | 0.9363  | 0.0627  | -0.1537 | 0.0173  | 0.3375  | 0.7480  |
| A0A3Q2U0N4 | 0.6495  | 0.3694  | 0.6201  | -0.2527 | -0.5295 | 0.0981  | -0.1093 |
| A0A3Q2UGD4 | 0.5380  | 0.6297  | 0.3211  | -0.0071 | -0.1400 | 0.0726  | 0.4375  |
| A0A3Q2UFG5 | -0.7659 | -0.6266 | -0.0413 | 0.3528  | 0.5440  | -0.4615 | -0.3331 |
| A0A3Q2U3V9 | -0.5791 | 0.5684  | -0.3559 | -0.0252 | 0.7376  | -0.0542 | 0.6460  |
| P26007     | -0.0847 | -0.6690 | 0.5133  | 0.3136  | -0.1704 | -0.2716 | -0.7222 |
| A0A1D5NXR0 | -0.0225 | 0.6821  | -0.1767 | -0.7345 | 0.2676  | -0.2001 | 0.1661  |
| A0A1D5P4G6 | 0.3108  | -0.3310 | 0.5058  | 0.2436  | -0.3862 | -0.1536 | -0.4963 |
| A0A1D5P7D0 | -0.2750 | -0.6040 | -0.3687 | 0.4473  | 0.0583  | 0.1575  | -0.2304 |
| R4GM71     | 0.5292  | 0.7651  | 0.0115  | -0.5063 | -0.0947 | 0.1022  | 0.4060  |
| A0A173G7D2 | -0.7398 | -0.4507 | -0.5181 | 0.2989  | 0.5592  | -0.1576 | -0.0797 |
| E1BY44     | 0.2882  | 0.7861  | -0.1595 | -0.6157 | 0.0595  | -0.0125 | 0.4873  |
| Q70YQ8     | 0.4343  | 0.5167  | 0.2915  | -0.6043 | -0.3604 | 0.0401  | 0.0239  |
| F1P2W2     | -0.3042 | 0.5986  | -0.5740 | -0.3839 | 0.4314  | 0.1359  | 0.5919  |
| F1NWN4     | -0.9506 | -0.3468 | -0.2076 | 0.1014  | 0.5883  | -0.4060 | -0.0213 |
| P07630     | 0.5302  | 0.0195  | 0.1644  | -0.0784 | -0.5003 | -0.0425 | -0.1399 |
| Q90593     | 0.1481  | -0.7625 | 0.3433  | 0.5774  | -0.5421 | 0.2220  | -0.4127 |
| A0A3Q2U871 | 0.4452  | -0.2678 | 0.7652  | 0.5789  | -0.5976 | 0.4466  | -0.1942 |
| F1P291     | -0.6046 | -0.5221 | -0.3752 | 0.0665  | 0.5196  | -0.2595 | -0.4673 |
| Q6IEC5     | 0.1700  | -0.7287 | 0.4199  | 0.3209  | -0.4442 | 0.0619  | -0.7351 |
| A0A3Q2U540 | 0.3881  | -0.3984 | 0.6352  | 0.1343  | -0.8134 | 0.2081  | -0.4048 |
| B5BSS3     | 0.2517  | 0.7901  | -0.2501 | -0.6499 | 0.1980  | -0.0002 | 0.4553  |
| F1NEB3     | 0.1676  | -0.5754 | 0.5232  | 0.3902  | -0.6396 | 0.0328  | -0.3692 |
| A0A3Q2U4V6 | -0.0741 | -0.8082 | 0.2495  | 0.5799  | -0.3470 | -0.0305 | -0.4465 |
| F1NWP1     | -0.1167 | 0.7375  | -0.3798 | -0.5300 | 0.4573  | -0.0031 | 0.5891  |
| A0A3Q2U324 | -0.8492 | -0.5712 | -0.3937 | 0.1735  | 0.5026  | -0.3003 | -0.2576 |

---

|            |         |         |         |         |         |         |         |
|------------|---------|---------|---------|---------|---------|---------|---------|
| A0A2R3TVM2 | 0.1656  | 0.7906  | -0.0464 | -0.2165 | 0.0925  | 0.0482  | 0.6349  |
| Q5ZMT0     | 0.5052  | 0.7092  | 0.1972  | -0.3157 | -0.3180 | 0.4058  | 0.4092  |
| E1C7T9     | 0.4755  | -0.1675 | 0.5419  | 0.0383  | -0.6325 | 0.1490  | -0.2118 |
| F1NSA8     | 0.2518  | 0.7873  | -0.3493 | -0.5931 | 0.1666  | -0.0648 | 0.4413  |
| E1BZN8     | -0.2439 | 0.6132  | -0.2052 | -0.5719 | 0.6210  | -0.3977 | 0.2311  |
| Q5W9C5     | 0.5197  | -0.3916 | 0.6571  | 0.3201  | -0.7591 | 0.1162  | -0.3484 |
| F1P201     | -0.8212 | -0.0987 | -0.2480 | 0.3586  | 0.5895  | 0.1281  | 0.3096  |
| A0A3Q2TZ57 | -0.3017 | -0.6932 | 0.5423  | 0.2669  | -0.2006 | -0.2092 | -0.5034 |
| P35062     | 0.5197  | -0.3916 | 0.6571  | 0.3201  | -0.7591 | 0.1162  | -0.3484 |
| F1NDH2     | 0.2705  | -0.2354 | 0.4755  | 0.2531  | -0.7232 | 0.1852  | -0.0207 |
| A0A1D5NTE7 | -0.2048 | -0.6952 | 0.2368  | 0.3540  | 0.0812  | -0.5028 | -0.6458 |
| A0A3Q2TSW8 | 0.2867  | 0.7979  | -0.1825 | -0.6575 | 0.1402  | -0.0011 | 0.4376  |
| Q90944     | 0.1223  | 0.7732  | -0.2683 | -0.6565 | 0.2634  | -0.0309 | 0.4887  |
| A0A3Q2TUE5 | 0.2511  | -0.3809 | 0.7858  | 0.3890  | -0.6532 | 0.2686  | -0.1869 |
| A0A3Q2U775 | -0.7742 | -0.5701 | -0.3495 | 0.3299  | 0.5157  | -0.1205 | -0.1628 |
| Q90631     | -0.1772 | 0.5244  | -0.2796 | -0.5183 | 0.4186  | -0.0602 | 0.3111  |
| F1NV09     | 0.5755  | -0.3790 | 0.6388  | 0.3061  | -0.6868 | 0.0674  | -0.4214 |
| F1P3P3     | 0.2747  | 0.7959  | -0.3786 | -0.5336 | 0.1953  | 0.2190  | 0.5174  |
| A0A3Q2UFJ3 | 0.5048  | -0.3990 | 0.6631  | 0.3103  | -0.7559 | 0.1112  | -0.3517 |
| P79795     | -0.5982 | -0.2899 | 0.0308  | 0.8304  | 0.4224  | 0.1531  | 0.2617  |
| P00565     | 0.0844  | 0.7838  | -0.5242 | -0.5027 | 0.3538  | 0.1667  | 0.5157  |
| A0A3Q2U0U0 | -0.3828 | 0.5559  | -0.6245 | -0.4301 | 0.6992  | -0.0994 | 0.4128  |
| F1NBT0     | 0.4553  | -0.3949 | 0.6106  | 0.5087  | -0.5959 | 0.3036  | -0.2910 |
| A0A3Q2TXN1 | -0.3218 | -0.8604 | 0.3788  | 0.3470  | -0.1225 | -0.3377 | -0.6714 |
| Q5ZLZ6     | 0.6471  | 0.6439  | 0.1201  | -0.5002 | -0.1112 | -0.0418 | 0.0258  |
| F1NSM7     | 0.5432  | 0.7696  | 0.0957  | -0.4409 | -0.2496 | 0.0781  | 0.3800  |

---

|            |         |         |         |         |         |         |         |
|------------|---------|---------|---------|---------|---------|---------|---------|
| F1NLW7     | 0.2532  | 0.9055  | -0.2555 | -0.6403 | 0.2041  | 0.0000  | 0.4708  |
| A0A3Q2U3X0 | 0.2574  | 0.7861  | -0.3214 | -0.6910 | 0.2050  | -0.0671 | 0.4390  |
| A0A1D5PLD7 | 0.6269  | 0.4463  | 0.2004  | -0.6226 | -0.4110 | 0.0523  | -0.1095 |
| F1NIW7     | 0.4896  | -0.4319 | 0.6521  | 0.3473  | -0.7481 | 0.1127  | -0.3649 |
| F1NVY4     | 0.2559  | 0.7878  | -0.2080 | -0.6594 | 0.1720  | -0.0069 | 0.4438  |
| F1NCZ2     | 0.4861  | 0.1442  | 0.7397  | 0.4946  | -0.4958 | 0.3228  | 0.2192  |
| R4GJX3     | 0.2060  | 0.7487  | -0.2506 | -0.6443 | 0.3574  | -0.3343 | 0.1990  |
| A0A1D5P9J0 | -0.2939 | -0.6720 | 0.2614  | 0.3748  | -0.2127 | 0.1241  | -0.4531 |
| A0A1D5PYR9 | -0.6841 | -0.7463 | -0.2651 | 0.4162  | 0.4639  | -0.3357 | -0.4061 |
| A0A1D5P6B0 | 0.2532  | 0.9055  | -0.2555 | -0.6403 | 0.2041  | 0.0000  | 0.4708  |
| P46157     | 0.4447  | 0.7821  | -0.0689 | -0.4350 | -0.0543 | 0.2843  | 0.5024  |
| Q90740     | 0.6490  | 0.6268  | 0.4133  | -0.3602 | -0.3412 | 0.2117  | 0.2119  |
| P00337     | 0.5548  | 0.2183  | 0.0804  | -0.1056 | -0.4727 | 0.0295  | 0.0419  |
| A0A0K0PUH6 | 0.2006  | 0.9393  | -0.0441 | -0.4060 | 0.1818  | 0.0990  | 0.6440  |
| A0A3Q2TZU8 | -0.1510 | 0.5989  | -0.4367 | -0.5847 | 0.7007  | -0.4399 | 0.1473  |
| Q5ZHM4     | 0.2722  | 0.7980  | 0.0187  | -0.3625 | -0.0237 | 0.3375  | 0.6076  |
| A0A1L1RYU0 | 0.5131  | 0.7413  | -0.0208 | -0.3943 | 0.0357  | 0.2040  | 0.2913  |
| E1C007     | 0.6351  | -0.2499 | 0.6686  | 0.2843  | -0.8458 | 0.4494  | -0.1876 |
| A0A2H4C5L1 | 0.2532  | 0.9055  | -0.2555 | -0.6403 | 0.2041  | 0.0000  | 0.4708  |
| Q5ZKY7     | -0.6081 | -0.7217 | 0.0966  | 0.5129  | 0.0023  | -0.0570 | -0.1814 |
| Q5F3U5     | 0.5669  | -0.2545 | 0.6751  | 0.0635  | -0.7997 | 0.1154  | -0.4361 |
| F1NSD3     | 0.5432  | -0.1417 | 0.4374  | 0.2028  | -0.7021 | 0.2236  | -0.2116 |
| R4GKL8     | -0.8095 | -0.0371 | -0.6261 | -0.0753 | 0.7622  | -0.2093 | 0.1262  |
| A0A3Q2U7Z1 | -0.1201 | -0.7379 | -0.0123 | 0.4405  | -0.2095 | 0.0735  | -0.3794 |
| F1NYI9     | 0.6306  | 0.6580  | 0.2635  | -0.2670 | -0.3233 | 0.1913  | 0.2906  |
| A0A3Q2U9L1 | 0.4698  | -0.3758 | 0.5071  | 0.3034  | -0.7001 | 0.0540  | -0.3199 |

---

|            |         |         |         |         |         |         |         |
|------------|---------|---------|---------|---------|---------|---------|---------|
| A0A3Q2TX84 | 0.1697  | -0.6118 | 0.1237  | 0.5052  | -0.4085 | 0.0606  | -0.3662 |
| F1NPN5     | -0.7571 | -0.2064 | -0.3367 | 0.5394  | 0.6552  | 0.0087  | 0.2543  |
| A0A1D5PPP9 | 0.5953  | -0.0709 | 0.8001  | 0.2926  | -0.6576 | 0.3242  | -0.1768 |
| Q5F3I1     | 0.5248  | -0.2895 | 0.5191  | 0.2179  | -0.6696 | -0.0091 | -0.3285 |
| A0A1L1RMF4 | 0.7257  | -0.0030 | 0.7164  | 0.1288  | -0.8822 | 0.3570  | -0.0611 |
| A0A3Q2UKP2 | -0.3279 | -0.6974 | 0.3458  | 0.3616  | 0.0802  | -0.1525 | -0.5708 |
| A0A3Q2UHT9 | 0.2565  | 0.7906  | -0.2569 | -0.6392 | 0.2015  | 0.0027  | 0.4716  |
| F1NUJ7     | 0.5854  | -0.3215 | 0.7013  | 0.3083  | -0.7788 | 0.1587  | -0.3179 |
| A0A1D5PKY9 | -0.0686 | -0.5368 | 0.3626  | 0.5054  | -0.3483 | -0.0868 | -0.2197 |
| A0A3Q2UHW3 | -0.7729 | -0.5139 | -0.4016 | 0.3201  | 0.5550  | -0.1162 | -0.1224 |
| A0A1L1RWM3 | -0.4245 | -0.7188 | 0.0555  | 0.4576  | 0.3140  | -0.3045 | -0.5208 |
| Q90WD0     | -0.8657 | 0.1505  | -0.6701 | -0.1553 | 0.7883  | -0.1374 | 0.2421  |
| Q9DER4     | -0.6703 | 0.1346  | -0.6530 | -0.1438 | 0.7852  | -0.1308 | 0.2328  |
| A0A1D5PIF2 | 0.2631  | 0.7021  | -0.0734 | -0.7101 | 0.0026  | 0.0090  | 0.1359  |
| A0A3Q2U504 | 0.1853  | 0.7898  | -0.3005 | -0.6382 | 0.2635  | -0.0107 | 0.4850  |
| A0A1D5PY04 | 0.3166  | -0.4469 | 0.5053  | 0.3893  | -0.3531 | -0.1084 | -0.4772 |
| Q2IAL7     | -0.6711 | -0.0920 | -0.7282 | 0.0173  | 0.6624  | -0.2218 | 0.1158  |
| F1NM67     | 0.6137  | 0.7444  | 0.0581  | -0.2935 | -0.1789 | 0.3241  | 0.3729  |
| A0A1D5PGT3 | 0.2532  | 0.7905  | -0.2555 | -0.6403 | 0.2041  | 0.0000  | 0.4708  |
| A0A3Q2UDP3 | 0.5554  | -0.4696 | 0.5387  | 0.4415  | -0.8038 | 0.3230  | -0.3230 |
| R4GIW4     | 0.2833  | 0.7821  | -0.4394 | -0.4939 | 0.1736  | 0.2720  | 0.5203  |
| Q90XB2     | 0.2532  | 0.7905  | -0.2555 | -0.6403 | 0.2041  | 0.0000  | 0.4708  |
| F1C6U4     | 0.1336  | 0.7870  | -0.4153 | -0.6091 | 0.2836  | -0.0208 | 0.5100  |
| A0A1D5P9U9 | -0.0562 | 0.7833  | -0.2750 | -0.5867 | 0.3054  | -0.0217 | 0.5687  |
| P21760     | 0.0069  | -0.7587 | 0.4208  | 0.4451  | -0.4448 | -0.0170 | -0.4663 |
| Q5ZLI2     | 0.5323  | -0.4116 | 0.6395  | 0.3483  | -0.7760 | 0.1598  | -0.3467 |

---

|            |         |         |         |         |         |         |         |
|------------|---------|---------|---------|---------|---------|---------|---------|
| Q2MJT5     | -0.0354 | -0.5553 | 0.3845  | 0.7181  | -0.1907 | 0.1801  | -0.2302 |
| Q5ZJX9     | 0.1311  | 0.7856  | -0.4404 | -0.4531 | 0.3305  | 0.2045  | 0.5875  |
| F1C6X7     | 0.4226  | -0.3830 | 0.6638  | 0.0731  | -0.6995 | 0.0015  | -0.5692 |
| R4GLT1     | 0.6228  | -0.1796 | 0.6726  | 0.1771  | -0.8092 | 0.1299  | -0.2361 |
| E1BWW2     | 0.5679  | 0.7837  | 0.0541  | -0.5686 | -0.1675 | 0.0617  | 0.3581  |
| E1BUA6     | -0.7729 | -0.5139 | -0.4016 | 0.3201  | 0.5550  | -0.1162 | -0.1224 |
| E1C0F3     | 0.2973  | -0.4709 | 0.6826  | 0.3812  | -0.7233 | 0.1058  | -0.2858 |
| A0A1D5NUZ0 | 0.2920  | 0.7870  | -0.1674 | -0.6580 | 0.1271  | -0.0014 | 0.4293  |
| Q91017     | -0.7682 | -0.5599 | -0.3979 | 0.3512  | 0.5244  | -0.1274 | -0.1489 |
| E1BW95     | 0.5316  | 0.6019  | 0.1820  | -0.3824 | -0.0406 | -0.1495 | 0.0700  |
| A0A1D5PPL7 | 0.6566  | 0.7385  | 0.0782  | -0.4459 | -0.1092 | 0.0355  | 0.1968  |
| Q27J90     | -0.2117 | -0.8722 | 0.2855  | 0.4120  | -0.3111 | -0.0618 | -0.5952 |
| A0A1L1RLL0 | 0.2470  | 0.9033  | -0.2595 | -0.6422 | 0.2146  | -0.0095 | 0.4656  |
| A0A3Q2UGF7 | 0.4451  | 0.7983  | -0.1401 | -0.3667 | -0.2463 | 0.3662  | 0.5993  |
| A0A3Q2UIJ5 | 0.5197  | -0.3916 | 0.6571  | 0.3201  | -0.7591 | 0.1162  | -0.3484 |
| Q5G8Y9     | 0.1673  | 0.7888  | -0.3135 | -0.6435 | 0.2831  | -0.0172 | 0.4780  |
| Q04584     | 0.2804  | 0.7928  | -0.2295 | -0.5517 | 0.1754  | 0.0171  | 0.5272  |
| F1NBW3     | 0.3207  | -0.4497 | 0.4376  | 0.4356  | -0.5329 | 0.1078  | -0.3669 |
| A0A3Q2UBB3 | -0.6389 | -0.6566 | -0.1502 | 0.3247  | 0.2996  | -0.0788 | -0.2537 |
| A0A1D5PXN3 | 0.3522  | 0.6353  | 0.0323  | -0.6738 | -0.1334 | -0.0302 | 0.1486  |
| A0A1D5P5T7 | -0.4576 | -0.4713 | -0.4199 | 0.3990  | 0.2897  | 0.2176  | -0.0580 |
| A0A3Q3APB3 | 0.5535  | -0.3430 | 0.6609  | 0.2871  | -0.7697 | 0.1199  | -0.3277 |
| F1P4U3     | 0.0607  | -0.6899 | 0.6148  | 0.4452  | -0.6149 | 0.0720  | -0.4368 |
| H9L0D7     | 0.3156  | 0.7871  | -0.0694 | -0.6407 | 0.0423  | -0.0027 | 0.3643  |
| A0A1L1RUW5 | 0.3492  | 0.7896  | -0.2102 | -0.6302 | 0.1003  | -0.0130 | 0.4411  |
| E1BSI4     | 0.1727  | 0.7896  | -0.2678 | -0.6459 | 0.2413  | -0.0104 | 0.4951  |

---

|            |         |         |         |         |         |         |         |
|------------|---------|---------|---------|---------|---------|---------|---------|
| A0A3Q3AJD3 | -0.7731 | -0.5131 | -0.4015 | 0.3206  | 0.5556  | -0.1159 | -0.1214 |
| A0A1D5PXM8 | 0.6851  | 0.2349  | 0.5545  | -0.1766 | -0.6842 | 0.1441  | -0.0033 |
| A0A3Q2UIT0 | 0.3084  | 0.7965  | -0.0886 | -0.4775 | 0.1589  | 0.0997  | 0.5789  |
| F1NL81     | -0.4007 | -0.4009 | -0.4521 | 0.3664  | 0.2739  | 0.2706  | -0.0114 |
| A0M8U0     | -0.7729 | -0.5139 | -0.4016 | 0.3201  | 0.5550  | -0.1162 | -0.1224 |
| F1NIM0     | -0.6807 | 0.2694  | -0.3493 | -0.2018 | 0.5207  | -0.0821 | 0.4390  |
| Q6PW00     | 0.9590  | 0.2373  | 0.4525  | 0.0378  | -0.8265 | 0.5123  | 0.0452  |
| Q5ZL65     | 0.2666  | 0.7904  | -0.2441 | -0.6443 | 0.1870  | 0.0008  | 0.4663  |
| F1NMF9     | 0.3165  | 0.7908  | -0.2019 | -0.6379 | 0.1381  | 0.0115  | 0.4578  |
| A0A3Q2TSK8 | -0.7729 | -0.5139 | -0.4016 | 0.3201  | 0.5550  | -0.1162 | -0.1224 |
| A0A1D5PT95 | 0.4665  | -0.4417 | 0.2768  | 0.4233  | -0.6920 | 0.2661  | -0.2619 |
| Q5ZL35     | 0.7751  | 0.3902  | 0.4786  | -0.0755 | -0.5630 | 0.2247  | 0.0782  |
| A0A1D5P7Y2 | -0.7729 | -0.5139 | -0.4016 | 0.3201  | 0.5550  | -0.1162 | -0.1224 |
| A0A1L1RZV0 | 0.2525  | 0.7905  | -0.2559 | -0.6404 | 0.2053  | -0.0012 | 0.4702  |
| Q8UWG7     | 0.4023  | 0.7900  | -0.1233 | -0.6264 | 0.0425  | 0.0278  | 0.4335  |
| P87362     | 0.0135  | 0.7860  | -0.2564 | -0.6046 | 0.2703  | -0.0144 | 0.5594  |
| Q9W6V5     | 0.3260  | 0.7914  | -0.2207 | -0.6216 | 0.1389  | 0.0294  | 0.4680  |
| A0A3Q2TXS3 | 0.0537  | -0.8162 | 0.5119  | 0.5489  | -0.5028 | 0.0729  | -0.5546 |
| E1C3Y3     | 0.5437  | -0.3781 | 0.6890  | 0.3382  | -0.8073 | 0.1457  | -0.3425 |
| E1C857     | 0.5712  | 0.1550  | 0.7108  | 0.3742  | -0.5702 | 0.2798  | 0.1555  |
| F1P386     | 0.2940  | 0.7708  | -0.2213 | -0.6393 | 0.1619  | 0.0074  | 0.4628  |
| Q90974     | -0.7579 | -0.5500 | -0.2679 | 0.4939  | 0.5064  | -0.0493 | -0.0830 |
| F1NLE7     | 0.7481  | 0.0773  | 0.6094  | -0.0048 | -0.7572 | 0.1342  | -0.1270 |
| Q9YHD2     | 0.0573  | -0.5716 | 0.2190  | 0.2693  | -0.1232 | -0.4361 | -0.5877 |
| Q5ZKS2     | -0.1510 | 0.6720  | -0.1641 | -0.6197 | 0.2074  | -0.0238 | 0.3695  |
| P23498     | -0.5775 | -0.1274 | -0.7021 | -0.3307 | 0.7235  | -0.4592 | -0.0766 |

---

|            |         |         |         |         |         |         |         |
|------------|---------|---------|---------|---------|---------|---------|---------|
| A0A1D5PMA3 | 0.5913  | -0.4568 | 0.3645  | 0.4469  | -0.8093 | 0.4545  | -0.2639 |
| F1NH19     | 0.4828  | 0.6031  | 0.2173  | -0.5771 | -0.4039 | 0.1822  | 0.1785  |
| Q9DF58     | -0.4937 | 0.1612  | -0.4241 | -0.0556 | 0.6489  | 0.0064  | 0.2186  |
| F1NPS5     | 0.2532  | 0.9055  | -0.2555 | -0.6403 | 0.2041  | 0.0000  | 0.4708  |
| F1N8W8     | -0.7729 | -0.5139 | -0.4016 | 0.3201  | 0.5550  | -0.1162 | -0.1224 |
| Q98SR1     | -0.5634 | -0.6494 | -0.3256 | 0.4575  | 0.2667  | -0.1472 | -0.2306 |
| A0A1D5PW36 | -0.7822 | -0.5336 | -0.3953 | 0.2511  | 0.6899  | -0.3432 | -0.2730 |
| Q9BD54     | 0.8086  | 0.2953  | 0.5668  | -0.1310 | -0.6965 | 0.1616  | -0.0098 |
| F1N851     | -0.7053 | -0.1330 | -0.5407 | 0.1015  | 0.7027  | -0.0890 | 0.0945  |
| E1C3X0     | 0.4497  | 0.3625  | 0.2713  | -0.3972 | -0.3513 | -0.0016 | 0.0711  |
| Q5ZJX7     | -0.6825 | -0.5679 | -0.2566 | 0.4118  | 0.4488  | -0.0481 | -0.1691 |
| E1C3D2     | 0.2532  | 0.7905  | -0.2555 | -0.6403 | 0.2041  | 0.0000  | 0.4708  |
| E1C1Q3     | 0.5197  | -0.3916 | 0.6571  | 0.3201  | -0.7591 | 0.1162  | -0.3484 |
| Q5F442     | 0.5197  | -0.3916 | 0.6571  | 0.3201  | -0.7591 | 0.1162  | -0.3484 |
| Q7T190     | -0.1335 | -0.6230 | 0.3769  | 0.5289  | -0.5252 | 0.3048  | -0.1031 |
| O42351     | 0.7302  | 0.5027  | 0.3727  | -0.3604 | -0.4411 | -0.0154 | 0.0481  |
| A0A1D5PMN6 | 0.0749  | 0.6987  | -0.3824 | -0.6346 | 0.2339  | -0.1465 | 0.3724  |
| Q7T2X3     | 0.2068  | 0.9712  | -0.1520 | -0.4346 | 0.2639  | 0.0971  | 0.6317  |
| A0A1D5PGI9 | -0.4165 | 0.5432  | -0.3755 | -0.4091 | 0.3798  | -0.1177 | 0.5383  |
| A0A3Q2TUM9 | 0.7478  | 0.0762  | 0.6097  | -0.0040 | -0.7574 | 0.1342  | -0.1275 |
| A0A1D5PNT8 | 0.3421  | 0.7808  | -0.1476 | -0.6327 | 0.0818  | 0.0211  | 0.4622  |

---

**Table S6 P value for the correlation analysis between DEPs and jejunal parameters**

|            | IL-1 $\beta$ | IL-10  | IL-6   | TNF- $\alpha$ | IgM    | IgG    | IgA    |
|------------|--------------|--------|--------|---------------|--------|--------|--------|
| A0A1D5NZY0 | 0.0134       | 0.2215 | 0.1269 | 0.4267        | 0.6103 | 0.0156 | 0.0296 |
| F1NK40     | 0.2742       | 0.0864 | 0.0876 | 0.9213        | 0.5398 | 0.4326 | 0.0721 |
| P01875     | 0.2511       | 0.4997 | 0.0533 | 0.7976        | 0.2866 | 0.7731 | 0.6105 |
| A0A1D5PCD2 | 0.0085       | 0.0934 | 0.5601 | 0.2472        | 0.1054 | 0.5705 | 0.5395 |
| A0A1D5PH32 | 0.9594       | 0.0860 | 0.2857 | 0.0622        | 0.4668 | 0.5655 | 0.3076 |
| Q90933     | 0.0598       | 0.4933 | 0.7551 | 0.3276        | 0.5813 | 0.3742 | 0.6384 |
| E1BTI7     | 0.6069       | 0.0007 | 0.7176 | 0.7608        | 0.7912 | 0.1666 | 0.0126 |
| P68139     | 0.1516       | 0.2972 | 0.0545 | 0.4010        | 0.0177 | 0.7659 | 0.3582 |
| Q7SX63     | 0.4937       | 0.0180 | 0.6889 | 0.1175        | 0.9256 | 0.8684 | 0.2439 |
| Q6Q1Q8     | 0.1516       | 0.2972 | 0.0545 | 0.4010        | 0.0177 | 0.7659 | 0.3582 |
| A0A3Q2TZA4 | 0.0197       | 0.1275 | 0.3673 | 0.6264        | 0.0244 | 0.1309 | 0.2871 |
| P09244     | 0.9006       | 0.0923 | 0.0275 | 0.3386        | 0.2859 | 0.7557 | 0.2085 |
| A0A3Q3ANZ2 | 0.0511       | 0.0756 | 0.8136 | 0.4418        | 0.7266 | 0.9624 | 0.4736 |
| F1NW23     | 0.8867       | 0.0560 | 0.5252 | 0.1716        | 0.3335 | 0.5994 | 0.1782 |
| O93410     | 0.0906       | 0.0915 | 0.0592 | 0.6304        | 0.2677 | 0.2193 | 0.2050 |
| F1NQD9     | 0.0015       | 0.1313 | 0.4355 | 0.4789        | 0.0705 | 0.3886 | 0.6233 |
| E1C7C1     | 0.0313       | 0.3135 | 0.0203 | 0.6726        | 0.0722 | 0.2965 | 0.5282 |
| A0A1D5PGD5 | 0.4502       | 0.1137 | 0.5650 | 0.2176        | 0.0984 | 0.5583 | 0.3186 |
| A5HUM6     | 0.1154       | 0.0074 | 0.7959 | 0.1327        | 0.5610 | 0.8689 | 0.3275 |
| A0A3Q2U7A2 | 0.3154       | 0.0390 | 0.4825 | 0.1671        | 0.5776 | 0.8714 | 0.3950 |
| P01994     | 0.2770       | 0.0002 | 0.8728 | 0.6930        | 0.9648 | 0.3744 | 0.0205 |
| A0A3Q2U0N4 | 0.0583       | 0.3278 | 0.0749 | 0.5118        | 0.1427 | 0.8018 | 0.7796 |

---

|            |        |        |        |        |        |        |        |
|------------|--------|--------|--------|--------|--------|--------|--------|
| A0A3Q2UGD4 | 0.1352 | 0.0692 | 0.3995 | 0.9856 | 0.7194 | 0.8528 | 0.2389 |
| A0A3Q2UFG5 | 0.0161 | 0.0709 | 0.9159 | 0.3517 | 0.1300 | 0.2111 | 0.3811 |
| A0A3Q2U3V9 | 0.1022 | 0.1103 | 0.3471 | 0.9486 | 0.0233 | 0.8898 | 0.0602 |
| P26007     | 0.8285 | 0.0488 | 0.1576 | 0.4111 | 0.6611 | 0.4796 | 0.0280 |
| A0A1D5NXR0 | 0.9543 | 0.0430 | 0.6493 | 0.0242 | 0.4863 | 0.6057 | 0.6694 |
| A0A1D5P4G6 | 0.4156 | 0.3843 | 0.1647 | 0.5277 | 0.3046 | 0.6932 | 0.1742 |
| A0A1D5P7D0 | 0.4738 | 0.0850 | 0.3288 | 0.2274 | 0.8816 | 0.6858 | 0.5510 |
| R4GM71     | 0.1429 | 0.0260 | 0.9766 | 0.1643 | 0.8084 | 0.7935 | 0.2783 |
| A0A173G7D2 | 0.0227 | 0.2234 | 0.1531 | 0.4346 | 0.1175 | 0.6856 | 0.8385 |
| E1BY44     | 0.4520 | 0.0015 | 0.6819 | 0.0775 | 0.8792 | 0.9746 | 0.1833 |
| Q70YQ8     | 0.2428 | 0.1544 | 0.4466 | 0.0848 | 0.3407 | 0.9184 | 0.9513 |
| F1P2W2     | 0.4260 | 0.0886 | 0.1060 | 0.3077 | 0.2463 | 0.7273 | 0.0931 |
| F1NWN4     | 0.0001 | 0.3605 | 0.5920 | 0.7952 | 0.0957 | 0.2783 | 0.9566 |
| P07630     | 0.1420 | 0.9603 | 0.6726 | 0.8412 | 0.1702 | 0.9136 | 0.7196 |
| Q90593     | 0.7037 | 0.0169 | 0.3657 | 0.1035 | 0.1316 | 0.5660 | 0.2696 |
| A0A3Q2U871 | 0.2299 | 0.4861 | 0.0163 | 0.1024 | 0.0892 | 0.2282 | 0.6165 |
| F1P291     | 0.0846 | 0.1493 | 0.3197 | 0.8650 | 0.1517 | 0.5000 | 0.2047 |
| Q6IEC5     | 0.6619 | 0.0259 | 0.2606 | 0.3998 | 0.2310 | 0.8744 | 0.0240 |
| A0A3Q2U540 | 0.3020 | 0.2882 | 0.0661 | 0.7306 | 0.0077 | 0.5911 | 0.2798 |
| B5BSS3     | 0.5135 | 0.0193 | 0.5163 | 0.0581 | 0.6096 | 0.9996 | 0.2181 |
| F1NEB3     | 0.6665 | 0.1050 | 0.1484 | 0.2992 | 0.0636 | 0.9332 | 0.3281 |
| A0A3Q2U4V6 | 0.8498 | 0.0084 | 0.5173 | 0.1016 | 0.3603 | 0.9379 | 0.2283 |
| F1NWP1     | 0.7650 | 0.0048 | 0.3134 | 0.1422 | 0.2159 | 0.9937 | 0.0951 |
| A0A3Q2U324 | 0.0038 | 0.1081 | 0.2944 | 0.6554 | 0.1679 | 0.4324 | 0.5033 |
| A0A2R3TVM2 | 0.6703 | 0.0087 | 0.9056 | 0.5758 | 0.8130 | 0.9021 | 0.0662 |
| Q5ZMT0     | 0.1653 | 0.0324 | 0.6110 | 0.4079 | 0.4043 | 0.2785 | 0.2741 |

---

|            |        |        |        |        |        |        |        |
|------------|--------|--------|--------|--------|--------|--------|--------|
| E1C7T9     | 0.1957 | 0.6666 | 0.1317 | 0.9221 | 0.0676 | 0.7020 | 0.5844 |
| F1NSA8     | 0.5134 | 0.0049 | 0.3569 | 0.0923 | 0.6684 | 0.8684 | 0.2344 |
| E1BZN8     | 0.5272 | 0.0791 | 0.5963 | 0.1076 | 0.0743 | 0.2891 | 0.5497 |
| Q5W9C5     | 0.1516 | 0.2972 | 0.0545 | 0.4010 | 0.0177 | 0.7659 | 0.3582 |
| F1P201     | 0.0066 | 0.8005 | 0.5199 | 0.3433 | 0.0948 | 0.7426 | 0.4176 |
| A0A3Q2TZ57 | 0.4301 | 0.0384 | 0.1314 | 0.4875 | 0.6047 | 0.5891 | 0.1671 |
| P35062     | 0.1516 | 0.2972 | 0.0545 | 0.4010 | 0.0177 | 0.7659 | 0.3582 |
| F1NDH2     | 0.4814 | 0.5420 | 0.1958 | 0.5112 | 0.0277 | 0.6334 | 0.9578 |
| A0A1D5NTE7 | 0.5972 | 0.0376 | 0.5395 | 0.3500 | 0.8354 | 0.1677 | 0.0603 |
| A0A3Q2TSW8 | 0.4545 | 0.0018 | 0.6383 | 0.0543 | 0.7190 | 0.9977 | 0.2388 |
| Q90944     | 0.7538 | 0.0021 | 0.4852 | 0.0548 | 0.4934 | 0.9370 | 0.1819 |
| A0A3Q2TUE5 | 0.5146 | 0.3118 | 0.0121 | 0.3008 | 0.0564 | 0.4846 | 0.6301 |
| A0A3Q2U775 | 0.0143 | 0.1090 | 0.3565 | 0.3859 | 0.1553 | 0.7575 | 0.6757 |
| Q90631     | 0.6482 | 0.1473 | 0.4662 | 0.1529 | 0.2622 | 0.8777 | 0.4152 |
| F1NV09     | 0.1049 | 0.3144 | 0.0640 | 0.4230 | 0.0410 | 0.8633 | 0.2587 |
| F1P3P3     | 0.4745 | 0.0298 | 0.3150 | 0.1390 | 0.6145 | 0.5713 | 0.1537 |
| A0A3Q2UFJ3 | 0.1657 | 0.2874 | 0.0516 | 0.4163 | 0.0185 | 0.7759 | 0.3534 |
| P79795     | 0.0888 | 0.4492 | 0.9374 | 0.0056 | 0.2573 | 0.6941 | 0.4963 |
| P00565     | 0.8291 | 0.0124 | 0.1474 | 0.1678 | 0.3502 | 0.6683 | 0.1553 |
| A0A3Q2U0U0 | 0.3092 | 0.1201 | 0.0722 | 0.2479 | 0.0361 | 0.7991 | 0.2695 |
| F1NBT0     | 0.2181 | 0.2929 | 0.0807 | 0.1619 | 0.0904 | 0.4271 | 0.4475 |
| A0A3Q2TXN1 | 0.3983 | 0.0029 | 0.3148 | 0.3602 | 0.7535 | 0.3741 | 0.0477 |
| Q5ZLZ6     | 0.0596 | 0.0613 | 0.7582 | 0.1703 | 0.7759 | 0.9150 | 0.9474 |
| F1NSM7     | 0.1307 | 0.0153 | 0.8065 | 0.2349 | 0.5171 | 0.8418 | 0.3131 |
| F1NLW7     | 0.5110 | 0.0008 | 0.5070 | 0.0632 | 0.5983 | 1.0000 | 0.2009 |
| A0A3Q2U3X0 | 0.5037 | 0.0029 | 0.3990 | 0.0393 | 0.5967 | 0.8638 | 0.2371 |

---

|            |        |        |        |        |        |        |        |
|------------|--------|--------|--------|--------|--------|--------|--------|
| A0A1D5PLD7 | 0.0708 | 0.2285 | 0.6052 | 0.0733 | 0.2718 | 0.8937 | 0.7791 |
| F1NIW7     | 0.1810 | 0.2457 | 0.0570 | 0.3598 | 0.0204 | 0.7728 | 0.3342 |
| F1NVY4     | 0.5063 | 0.0019 | 0.5913 | 0.0533 | 0.6581 | 0.9859 | 0.2315 |
| F1NCZ2     | 0.1846 | 0.7114 | 0.0227 | 0.1759 | 0.1746 | 0.3969 | 0.5710 |
| R4GJX3     | 0.5950 | 0.0203 | 0.5155 | 0.0611 | 0.3451 | 0.3793 | 0.6077 |
| A0A1D5P9J0 | 0.4427 | 0.0474 | 0.4970 | 0.3203 | 0.5827 | 0.7505 | 0.2206 |
| A0A1D5PYR9 | 0.0421 | 0.0209 | 0.4906 | 0.2652 | 0.2084 | 0.3772 | 0.2781 |
| A0A1D5P6B0 | 0.5110 | 0.0008 | 0.5070 | 0.0632 | 0.5983 | 1.0000 | 0.2009 |
| P46157     | 0.2305 | 0.0067 | 0.8602 | 0.2419 | 0.8897 | 0.4585 | 0.1681 |
| Q90740     | 0.0586 | 0.0708 | 0.2688 | 0.3410 | 0.3689 | 0.5846 | 0.5842 |
| P00337     | 0.1210 | 0.5725 | 0.8371 | 0.7868 | 0.1988 | 0.9399 | 0.9147 |
| A0A0K0PUH6 | 0.6049 | 0.0002 | 0.9102 | 0.2782 | 0.6397 | 0.7999 | 0.0612 |
| A0A3Q2TZU8 | 0.6982 | 0.0883 | 0.2399 | 0.0982 | 0.0355 | 0.2360 | 0.7053 |
| Q5ZHM4     | 0.4787 | 0.0092 | 0.9620 | 0.3377 | 0.9518 | 0.3745 | 0.0827 |
| A0A1L1RYU0 | 0.1577 | 0.0223 | 0.9577 | 0.2937 | 0.9274 | 0.5985 | 0.4470 |
| E1C007     | 0.0661 | 0.5166 | 0.0490 | 0.4585 | 0.0041 | 0.2249 | 0.6289 |
| A0A2H4C5L1 | 0.5110 | 0.0008 | 0.5070 | 0.0632 | 0.5983 | 1.0000 | 0.2009 |
| Q5ZKY7     | 0.0823 | 0.0282 | 0.8046 | 0.1580 | 0.9953 | 0.8841 | 0.6404 |
| Q5F3U5     | 0.1114 | 0.5087 | 0.0460 | 0.8710 | 0.0097 | 0.7674 | 0.2406 |
| F1NSD3     | 0.1307 | 0.7161 | 0.2391 | 0.6007 | 0.0350 | 0.5630 | 0.5847 |
| R4GKL8     | 0.0091 | 0.9245 | 0.0713 | 0.8473 | 0.0170 | 0.5888 | 0.7464 |
| A0A3Q2U7Z1 | 0.7583 | 0.0232 | 0.9749 | 0.2354 | 0.5885 | 0.8510 | 0.3139 |
| F1NYI9     | 0.0687 | 0.0541 | 0.4933 | 0.4874 | 0.3960 | 0.6220 | 0.4481 |
| A0A3Q2U9L1 | 0.2020 | 0.3190 | 0.1635 | 0.4274 | 0.0357 | 0.8902 | 0.4014 |
| A0A3Q2TX84 | 0.6626 | 0.0800 | 0.7512 | 0.1654 | 0.2750 | 0.8770 | 0.3325 |
| F1NPN5     | 0.0182 | 0.5942 | 0.3757 | 0.1339 | 0.0554 | 0.9822 | 0.5090 |

---

|            |        |        |        |        |        |        |        |
|------------|--------|--------|--------|--------|--------|--------|--------|
| A0A1D5PPP9 | 0.0908 | 0.8561 | 0.0096 | 0.4448 | 0.0543 | 0.3947 | 0.6491 |
| Q5F3I1     | 0.1469 | 0.4499 | 0.1521 | 0.5733 | 0.0485 | 0.9814 | 0.3881 |
| A0A1L1RMF4 | 0.0269 | 0.9938 | 0.0299 | 0.7413 | 0.0016 | 0.3456 | 0.8759 |
| A0A3Q2UKP2 | 0.3891 | 0.0368 | 0.3620 | 0.3390 | 0.8375 | 0.6952 | 0.1085 |
| A0A3Q2UHT9 | 0.5053 | 0.0008 | 0.5046 | 0.0638 | 0.6031 | 0.9946 | 0.2000 |
| F1NUJ7     | 0.0977 | 0.3988 | 0.0353 | 0.4195 | 0.0134 | 0.6835 | 0.4045 |
| A0A1D5PKY9 | 0.8609 | 0.1362 | 0.3375 | 0.1652 | 0.3584 | 0.8243 | 0.5701 |
| A0A3Q2UHW3 | 0.0146 | 0.1570 | 0.2839 | 0.4010 | 0.1209 | 0.7659 | 0.7537 |
| A0A1L1RWM3 | 0.2548 | 0.0291 | 0.8872 | 0.2156 | 0.4106 | 0.4256 | 0.1506 |
| Q90WD0     | 0.0503 | 0.6991 | 0.0483 | 0.6900 | 0.0116 | 0.7244 | 0.5303 |
| Q9DER4     | 0.0482 | 0.7300 | 0.0565 | 0.7121 | 0.0122 | 0.7374 | 0.5466 |
| A0A1D5PIF2 | 0.4941 | 0.0350 | 0.8511 | 0.0321 | 0.9946 | 0.9816 | 0.7274 |
| A0A3Q2U504 | 0.6332 | 0.0010 | 0.4320 | 0.0644 | 0.4933 | 0.9783 | 0.1857 |
| A0A1D5PY04 | 0.4064 | 0.2278 | 0.1652 | 0.3004 | 0.3513 | 0.7813 | 0.1940 |
| Q2IAL7     | 0.0478 | 0.8139 | 0.0261 | 0.9648 | 0.0519 | 0.5663 | 0.7667 |
| F1NM67     | 0.0788 | 0.0214 | 0.8820 | 0.4434 | 0.6452 | 0.3949 | 0.3229 |
| A0A1D5PGT3 | 0.5110 | 0.0008 | 0.5070 | 0.0632 | 0.5983 | 1.0000 | 0.2009 |
| A0A3Q2UDP3 | 0.1205 | 0.2022 | 0.1345 | 0.2342 | 0.0090 | 0.3966 | 0.3965 |
| R4GIW4     | 0.4600 | 0.0066 | 0.2366 | 0.1766 | 0.6551 | 0.4790 | 0.1510 |
| Q90XB2     | 0.5110 | 0.0008 | 0.5070 | 0.0632 | 0.5983 | 1.0000 | 0.2009 |
| F1C6U4     | 0.7318 | 0.0023 | 0.2663 | 0.0817 | 0.4596 | 0.9577 | 0.1607 |
| A0A1D5P9U9 | 0.8858 | 0.0053 | 0.4740 | 0.0967 | 0.4242 | 0.9558 | 0.1101 |
| P21760     | 0.9860 | 0.0178 | 0.2594 | 0.2299 | 0.2303 | 0.9653 | 0.2057 |
| Q5ZLI2     | 0.1402 | 0.2710 | 0.0636 | 0.3584 | 0.0140 | 0.6813 | 0.3607 |
| Q2MJT5     | 0.9280 | 0.1206 | 0.3069 | 0.0293 | 0.6231 | 0.6429 | 0.5512 |
| Q5ZJX9     | 0.7368 | 0.0032 | 0.2355 | 0.2207 | 0.3851 | 0.5977 | 0.0962 |

---

|            |        |        |        |        |        |        |        |
|------------|--------|--------|--------|--------|--------|--------|--------|
| F1C6X7     | 0.2572 | 0.3089 | 0.0512 | 0.8516 | 0.0360 | 0.9970 | 0.1097 |
| R4GLT1     | 0.0732 | 0.6439 | 0.0471 | 0.6484 | 0.0091 | 0.7391 | 0.5409 |
| E1BWW2     | 0.1107 | 0.0049 | 0.8901 | 0.1101 | 0.6667 | 0.8747 | 0.3440 |
| E1BUA6     | 0.0146 | 0.1570 | 0.2839 | 0.4010 | 0.1209 | 0.7659 | 0.7537 |
| E1C0F3     | 0.4371 | 0.2007 | 0.0427 | 0.3114 | 0.0276 | 0.7865 | 0.4559 |
| A0A1D5NUZ0 | 0.4458 | 0.0023 | 0.6668 | 0.0540 | 0.7446 | 0.9972 | 0.2489 |
| Q91017     | 0.0156 | 0.1169 | 0.2888 | 0.3540 | 0.1472 | 0.7440 | 0.7022 |
| E1BW95     | 0.1408 | 0.0864 | 0.6392 | 0.3097 | 0.9175 | 0.7010 | 0.8580 |
| A0A1D5PPL7 | 0.0547 | 0.0230 | 0.8415 | 0.2289 | 0.7798 | 0.9278 | 0.6117 |
| Q27J90     | 0.5846 | 0.0022 | 0.4565 | 0.2705 | 0.4152 | 0.8745 | 0.0908 |
| A0A1L1RLL0 | 0.5217 | 0.0008 | 0.5001 | 0.0622 | 0.5792 | 0.9807 | 0.2065 |
| A0A3Q2UGF7 | 0.2299 | 0.0099 | 0.7192 | 0.3317 | 0.5228 | 0.3324 | 0.0881 |
| A0A3Q2UIJ5 | 0.1516 | 0.2972 | 0.0545 | 0.4010 | 0.0177 | 0.7659 | 0.3582 |
| Q5G8Y9     | 0.6671 | 0.0014 | 0.4113 | 0.0615 | 0.4604 | 0.9650 | 0.1931 |
| Q04584     | 0.4648 | 0.0003 | 0.5525 | 0.1236 | 0.6518 | 0.9651 | 0.1447 |
| F1NBW3     | 0.4001 | 0.2246 | 0.2388 | 0.2412 | 0.1396 | 0.7825 | 0.3314 |
| A0A3Q2UBB3 | 0.0640 | 0.0547 | 0.6997 | 0.3939 | 0.4336 | 0.8403 | 0.5100 |
| A0A1D5PXN3 | 0.3526 | 0.0660 | 0.9343 | 0.0466 | 0.7322 | 0.9384 | 0.7027 |
| A0A1D5P5T7 | 0.2155 | 0.2003 | 0.2606 | 0.2874 | 0.4495 | 0.5738 | 0.8821 |
| A0A3Q3APB3 | 0.1221 | 0.3662 | 0.0526 | 0.4538 | 0.0153 | 0.7586 | 0.3893 |
| F1P4U3     | 0.8768 | 0.0397 | 0.0781 | 0.2298 | 0.0780 | 0.8539 | 0.2398 |
| H9L0D7     | 0.4080 | 0.0118 | 0.8592 | 0.0630 | 0.9139 | 0.9945 | 0.3351 |
| A0A1L1RUW5 | 0.3570 | 0.0011 | 0.5873 | 0.0689 | 0.7975 | 0.9735 | 0.2346 |
| E1BSI4     | 0.6568 | 0.0011 | 0.4859 | 0.0602 | 0.5317 | 0.9788 | 0.1754 |
| A0A3Q3AJD3 | 0.0146 | 0.1578 | 0.2841 | 0.4003 | 0.1204 | 0.7666 | 0.7556 |
| A0A1D5PXM8 | 0.0417 | 0.5430 | 0.1213 | 0.6494 | 0.0421 | 0.7114 | 0.9933 |

---

|            |        |        |        |        |        |        |        |
|------------|--------|--------|--------|--------|--------|--------|--------|
| A0A3Q2UIT0 | 0.4194 | 0.0000 | 0.8208 | 0.1936 | 0.6830 | 0.7986 | 0.1024 |
| F1NL81     | 0.2852 | 0.2849 | 0.2218 | 0.3321 | 0.4757 | 0.4813 | 0.9768 |
| A0M8U0     | 0.0146 | 0.1570 | 0.2839 | 0.4010 | 0.1209 | 0.7659 | 0.7537 |
| F1NIM0     | 0.0436 | 0.4833 | 0.3568 | 0.6026 | 0.1506 | 0.8337 | 0.2371 |
| Q6PW00     | 0.0000 | 0.5387 | 0.2213 | 0.9231 | 0.0060 | 0.1585 | 0.9082 |
| Q5ZL65     | 0.4881 | 0.0008 | 0.5268 | 0.0611 | 0.6300 | 0.9983 | 0.2057 |
| F1NNF9     | 0.4067 | 0.0007 | 0.6024 | 0.0645 | 0.7232 | 0.9765 | 0.2153 |
| A0A3Q2TSK8 | 0.0146 | 0.1570 | 0.2839 | 0.4010 | 0.1209 | 0.7659 | 0.7537 |
| A0A1D5PT95 | 0.2056 | 0.2339 | 0.4709 | 0.2562 | 0.0389 | 0.4889 | 0.4960 |
| Q5ZL35     | 0.0141 | 0.2992 | 0.1924 | 0.8470 | 0.1145 | 0.5611 | 0.8415 |
| A0A1D5P7Y2 | 0.0146 | 0.1570 | 0.2839 | 0.4010 | 0.1209 | 0.7659 | 0.7537 |
| A0A1L1RZV0 | 0.5121 | 0.0008 | 0.5063 | 0.0631 | 0.5961 | 0.9976 | 0.2016 |
| Q8UWG7     | 0.2831 | 0.0009 | 0.7521 | 0.0711 | 0.9136 | 0.9434 | 0.2437 |
| P87362     | 0.9726 | 0.0029 | 0.5055 | 0.0846 | 0.4818 | 0.9707 | 0.1173 |
| Q9W6V5     | 0.3919 | 0.0006 | 0.5682 | 0.0739 | 0.7216 | 0.9401 | 0.2039 |
| A0A3Q2TXS3 | 0.8908 | 0.0073 | 0.1589 | 0.1259 | 0.1677 | 0.8522 | 0.1212 |
| E1C3Y3     | 0.1303 | 0.3157 | 0.0401 | 0.3733 | 0.0058 | 0.7084 | 0.3670 |
| E1C857     | 0.1082 | 0.6906 | 0.0318 | 0.3212 | 0.1089 | 0.4659 | 0.6895 |
| F1P386     | 0.4426 | 0.0007 | 0.5671 | 0.0638 | 0.6773 | 0.9849 | 0.2096 |
| Q90974     | 0.0180 | 0.1250 | 0.4858 | 0.1766 | 0.1642 | 0.8997 | 0.8318 |
| F1NLE7     | 0.0204 | 0.8433 | 0.0815 | 0.9903 | 0.0181 | 0.7307 | 0.7448 |
| Q9YHD2     | 0.8836 | 0.1078 | 0.5713 | 0.4835 | 0.7522 | 0.2407 | 0.0961 |
| Q5ZKS2     | 0.6981 | 0.0474 | 0.6731 | 0.0751 | 0.5923 | 0.9516 | 0.3278 |
| P23498     | 0.1035 | 0.7440 | 0.0350 | 0.3847 | 0.0276 | 0.2137 | 0.8446 |
| A0A1D5PMA3 | 0.0936 | 0.2164 | 0.3348 | 0.2278 | 0.0011 | 0.2191 | 0.4926 |
| F1NH19     | 0.1880 | 0.0856 | 0.5743 | 0.1037 | 0.2810 | 0.6390 | 0.6459 |

---

|            |        |        |        |        |        |        |        |
|------------|--------|--------|--------|--------|--------|--------|--------|
| Q9DF58     | 0.1768 | 0.6786 | 0.2552 | 0.8871 | 0.0586 | 0.9870 | 0.5720 |
| F1NPS5     | 0.5110 | 0.0008 | 0.5070 | 0.0632 | 0.5983 | 1.0000 | 0.2009 |
| F1N8W8     | 0.0146 | 0.1570 | 0.2839 | 0.4010 | 0.1209 | 0.7659 | 0.7537 |
| Q98SR1     | 0.1142 | 0.0584 | 0.3925 | 0.2157 | 0.4878 | 0.7056 | 0.5505 |
| A0A1D5PW36 | 0.0127 | 0.1389 | 0.2924 | 0.5146 | 0.0397 | 0.3659 | 0.4772 |
| Q9BD54     | 0.0083 | 0.4404 | 0.1116 | 0.7370 | 0.0371 | 0.6779 | 0.9801 |
| F1N851     | 0.0338 | 0.7330 | 0.1328 | 0.7951 | 0.0347 | 0.8198 | 0.8089 |
| E1C3X0     | 0.2245 | 0.3377 | 0.4801 | 0.2898 | 0.3539 | 0.9967 | 0.8557 |
| Q5ZJX7     | 0.0428 | 0.1107 | 0.5051 | 0.2708 | 0.2256 | 0.9022 | 0.6637 |
| E1C3D2     | 0.5110 | 0.0778 | 0.5070 | 0.0632 | 0.5983 | 1.0000 | 0.2009 |
| E1C1Q3     | 0.1516 | 0.2972 | 0.0545 | 0.4010 | 0.0177 | 0.7659 | 0.3582 |
| Q5F442     | 0.1516 | 0.2972 | 0.0545 | 0.4010 | 0.0177 | 0.7659 | 0.3582 |
| Q7T190     | 0.7321 | 0.0731 | 0.3174 | 0.1432 | 0.1465 | 0.4251 | 0.7919 |
| O42351     | 0.0255 | 0.1678 | 0.3232 | 0.3407 | 0.2347 | 0.9687 | 0.9022 |
| A0A1D5PMN6 | 0.8480 | 0.0362 | 0.3097 | 0.0663 | 0.5447 | 0.7068 | 0.3236 |
| Q7T2X3     | 0.5934 | 0.0000 | 0.6962 | 0.2425 | 0.4926 | 0.8038 | 0.0680 |
| A0A1D5PGI9 | 0.2649 | 0.1307 | 0.3193 | 0.2742 | 0.3133 | 0.7630 | 0.1349 |
| A0A3Q2TUM9 | 0.0205 | 0.8454 | 0.0813 | 0.9918 | 0.0181 | 0.7307 | 0.7437 |
| A0A1D5PNT8 | 0.3675 | 0.0201 | 0.7047 | 0.0674 | 0.8343 | 0.9570 | 0.2103 |

---
